# Supplementary material
Source: PubMed Central journal article supplement (PMC6785230)
Supplement: ehp4381.s001.acco.pdf [file ehp4381.s001.acco.pdf]

**Note to readers with disabilities:** *EHP* strives to ensure that all journal content is accessible to all readers. However, some figures and Supplemental Material published in *EHP* articles may not conform to [508 standards](#) due to the complexity of the information being presented. If you need assistance accessing journal content, please contact [ehp508@niehs.nih.gov](mailto:ehp508@niehs.nih.gov). Our staff will work with you to assess and meet your accessibility needs within 3 working days.

### **Supplemental Material**

#### **Association between Outdoor Air Pollution and Childhood Leukemia: A Systematic Review and Dose–Response Meta-Analysis**

Tommaso Filippini, Elizabeth E. Hatch, Kenneth J. Rothman, Julia E. Heck, Andrew S. Park, Alessio Crippa, Nicola Orsini, and Marco Vinceti

#### **Table of Contents**

**Table S1.** Detailed PECOS statement used for identification of search strategies implemented on online databases.

**Table S2.** Newcastle - Ottawa quality assessment scale for included studies: details used for study score assignment. High quality choices are identified with a ‘star’ (i.e. asterisk). A maximum of one ‘star’ for each item within the ‘Selection’ and ‘Exposure/Outcome’ categories; maximum of two ‘stars’ for ‘Comparability’ can be identified.

**Table S3.** Newcastle - Ottawa quality assessment scale (NOS) for included studies: details of score assignment for each included study, divided according to case-control and cohort study design. S-1 through S-4 correspond to the ‘Selection’ questions, C-1 and C-2 correspond to the ‘Comparability’ questions, E-1 through E-3 correspond to the ‘Exposure’ questions, and O-1 through O-3 correspond to the ‘Outcome’ questions reported in Table S2. Letters stand for answers to each question reported in Table S2, and number in parenthesis indicate if the given answer identified a high (1) or low (0) quality rank. Total score is the sum of the score for each answer to the NOS scale. A high score indicates that the study is of high quality.

**Table S4.** Summary risk ratios (RR) of childhood leukemia in the highest exposure category versus the lowest one for traffic density, benzene and nitrogen dioxide (NO<sub>2</sub>) exposure, for all studies and stratified by age at diagnosis, leukemia subtype, exposure timing, and region. Results of leave-one-out sensitivity analysis of range of summary RR (‘min RR’ and ‘max RR’) investigating the influence of each individual study on the overall meta-analysis summary estimates.

**Table S5.** Summary risk ratios (RR) for association of childhood leukemia with particulate matter (PM<sub>2.5</sub>/PM<sub>10</sub>) and 1,3-butadiene comparing the highest versus the lowest exposure categories for all studies, and stratified by age at diagnosis, leukemia subtype, exposure timing, and region. Results of leave-one-out sensitivity analysis of range of summary RR ('min RR' and 'max RR') investigating the influence of each individual study on the overall meta-analysis summary estimates.

**Figure S1.** Risk ratio (RR) of childhood leukemia from indicators of traffic exposure for all children: all studies (A); by leukemia subtype (B); by exposure window, i.e. residence at birth vs. at diagnosis (C); by region/continent (D). The area of each gray square is proportional to the inverse of the variance of the estimated log RR. Black diamonds represent point estimates of RR and horizontal lines represent their 95% confidence intervals (CIs). The open diamonds represent the combined RR for each subgroup and the overall RR for all studies. The solid line represents RR=1. The dash line represents the point estimate of overall RR for all studies.

**Figure S2.** Risk ratio (RR) of childhood leukemia and leukemia subtype from benzene exposure for all children: all studies (A); by leukemia subtype (B); by exposure window, i.e. residence at birth vs. at diagnosis (C); by region/continent (D). The area of each gray square is proportional to the inverse of the variance of the estimated log RR. Black diamonds represent point estimates of RR and horizontal lines represent their 95% confidence intervals (CIs). The open diamonds represent the combined RR for each subgroup and the overall RR for all studies. The solid line represents RR=1. The dash line represents the point estimate of overall RR for all studies.

**Figure S3.** Risk ratio (RR) of childhood leukemia and leukemia subtype from air NO<sub>2</sub> exposure for all children: all studies (A); by leukemia subtype (B); by exposure window, i.e. residence at birth vs. at diagnosis (C); by region/continent (D). The area of each gray square is proportional to the inverse of the variance of the estimated log RR. Black diamonds represent point estimates of RR and horizontal lines represent their 95% confidence intervals (CIs). The open diamonds represent the combined RR for each subgroup and the overall RR for all studies. The solid line represents RR=1. The dash line represents the point estimate of overall RR for all studies.

**Figure S4.** Risk ratio (RR) with 95% confidence interval (CI) of childhood leukemia from particulate matter (PM<sub>2.5</sub>) for all children: all studies (A); by leukemia subtype (B); by exposure window, i.e. residence at birth vs. at diagnosis (C); by region/continent (D). The area of each gray square is proportional to the inverse of the variance of the estimated log RR. Black diamonds represent point estimates of RR and horizontal lines represent their 95% confidence intervals (CIs). The open diamonds represent the combined RR for each subgroup and the overall RR for all studies. The solid line represents RR=1. The dash line represents the point estimate of overall RR for all studies.

**Figure S5.** Risk ratio (RR) with 95% confidence interval (CI) of childhood leukemia from particulate matter (PM<sub>10</sub>) for all children: all studies (A); by leukemia subtype (B); by exposure window, i.e. residence at birth vs. at diagnosis (C); by region/continent (D). The area of each gray square is proportional to the inverse of the variance of the estimated log RR. Black diamonds represent point estimates of RR and horizontal lines represent their 95% confidence intervals (CIs). The open diamonds represent the combined RR for each subgroup and the overall RR for all studies. The solid line represents RR=1. The dash line represents the point estimate of overall RR for all studies.

**Figure S6.** Risk ratio (RR) of childhood leukemia and leukemia subtype from 1,3-butadiene exposure for all children (all pre-school, i.e. <6 years): all studies (A); by leukemia subtype (B); by exposure window, i.e. residence at birth vs. at diagnosis (C); by region/continent (D). The area of each gray square is proportional to the inverse of the variance of the estimated log RR. Black diamonds represent point estimates of RR and horizontal lines represent their 95% confidence intervals (CIs). The open diamonds represent the combined RR for each subgroup and the overall RR for all studies. The solid line represents RR=1. The dash line represents the point estimate of overall RR for all studies.

**Figure S7.** Risk ratio (RR) of childhood leukemia from indicators of traffic exposure restricted to pre-school children: all studies (A); by leukemia subtype (B); by exposure window, i.e. residence at birth vs. at diagnosis (C); by region/continent (D). The area of each gray square is proportional to the inverse of the variance of the estimated log RR. Black diamonds represent point estimates of RR and horizontal lines represent their 95% confidence intervals (CIs). The open diamonds represent the combined RR for each subgroup and the overall RR for all studies. The solid line represents RR=1. The dash line represents the point estimate of overall RR for all studies.

**Figure S8.** Risk ratio (RR) of childhood leukemia and leukemia subtype from benzene exposure restricted to pre-school children: all studies (A); by leukemia subtype (B); by exposure window, i.e. residence at birth vs. at diagnosis (C); by region/continent (D). The area of each gray square is proportional to the inverse of the variance of the estimated log RR. Black diamonds represent point estimates of RR and horizontal lines represent their 95% confidence intervals (CIs). The open diamonds represent the combined RR for each subgroup and the overall RR for all studies. The solid line represents RR=1. The dash line represents the point estimate of overall RR for all studies.

**Figure S9.** Risk ratio (RR) of childhood leukemia and leukemia subtype from air NO<sub>2</sub> exposure restricted to pre-school children: all studies (A); by leukemia subtype (B); by exposure window, i.e. residence at birth vs. at diagnosis (C); by region/continent (D). The area of each gray square is proportional to the inverse of the variance of the estimated log RR. Black diamonds represent point estimates of RR and horizontal lines represent their 95% confidence intervals (CIs). The open diamonds represent the combined RR for each subgroup and the overall RR for all studies. The solid line represents RR=1. The dash line represents the point estimate of overall RR for all studies.

**Figure S10.** Risk ratio (RR) with 95% confidence interval (CI) of childhood leukemia from particulate matter (PM<sub>2.5</sub>) restricted to pre-school children: all studies (A); by leukemia subtype (B); by exposure window, i.e. residence at birth vs. at diagnosis (C); by region/continent (D). The area of each gray square is proportional to the inverse of the variance of the estimated log RR. Black diamonds represent point estimates of RR and horizontal lines represent their 95% confidence intervals (CIs). The open diamonds represent the combined RR for each subgroup and the overall RR for all studies. The solid line represents RR=1. The dash line represents the point estimate of overall RR for all studies.

**Figure S11.** Risk ratio (RR) with 95% confidence interval (CI) of childhood leukemia from particulate matter (PM<sub>10</sub>) restricted to pre-school children: all studies (A); by leukemia subtype (B); by exposure window, i.e. residence at birth vs. at diagnosis (C); by region/continent (D). The area of each gray square is proportional to the inverse of the variance of the estimated log RR. Black diamonds represent point estimates of RR and horizontal lines represent their 95% confidence intervals (CIs). The open diamonds represent the combined RR for each subgroup and the overall RR for all studies. The solid line represents RR=1. The dash line represents the point estimate of overall RR for all studies.

**Figure S12.** Risk ratio (RR) of childhood leukemia from indicators of traffic exposure restricted to older (>6 years) children: all studies (A); by leukemia subtype (B); by exposure window, i.e. residence at birth vs. at diagnosis (C); by region/continent (D). The area of each gray square is proportional to the inverse of the variance of the estimated log RR. Black diamonds represent point estimates of RR and horizontal lines represent their 95% confidence intervals (CIs). The open diamonds represent the combined RR for each subgroup and the overall RR for all studies. The solid line represents RR=1. The dash line represents the point estimate of overall RR for all studies.

**Figure S13.** Risk ratio (RR) of childhood leukemia and leukemia subtype from benzene exposure restricted to older (>6 years) children: all studies (A); by leukemia subtype (B); by exposure window, i.e. residence at birth vs. at diagnosis (C); by region/continent (D). The area of each gray square is proportional to the inverse of the variance of the estimated log RR. Black diamonds represent point estimates of RR and horizontal lines represent their 95% confidence intervals (CIs). The open diamonds represent the combined RR for each subgroup and the overall RR for all studies. The solid line represents RR=1. The dash line represents the point estimate of overall RR for all studies.

**Figure S14.** Risk ratio (RR) of childhood leukemia from NO<sub>2</sub> exposure restricted to older (>6 years) children: all studies (A); by exposure window, i.e. residence at birth vs. at diagnosis (C); by region/continent (C). The area of each gray square is proportional to the inverse of the variance of the estimated log RR. Black diamonds represent point estimates of RR and horizontal lines represent their 95% confidence intervals (CIs). The open diamonds represent the combined RR for each subgroup and the overall RR for all studies. The solid line represents RR=1. The dash line represents the point estimate of overall RR for all studies.



**Figure S15.** Risk ratio (RR) with 95% confidence interval (CI) of childhood leukemia from particulate matter (PM<sub>10</sub>) restricted to pre-school children: all studies (A); by leukemia subtype (B); by exposure window, i.e. residence at birth vs. at diagnosis (C); by region/continent (D). The area of each gray square is proportional to the inverse of the variance of the estimated log RR. Black diamonds represent point estimates of RR and horizontal lines represent their 95% confidence intervals (CIs). The open diamonds represent the combined RR for each subgroup and the overall RR for all studies. The solid line represents RR=1. The dash line represents the point estimate of overall RR for all studies.

**Figure S16.** Sensitivity analysis with summary estimate with 95% confidence interval (CI) of childhood leukemia from indicators of traffic exposure for all children after removal of single study result (leave-one-out analysis): all studies (A); by leukemia subtype (B); by exposure window, i.e. residence at birth vs. at diagnosis (C); by region/continent (D). Each given named study is omitted when computing the overall meta-analysis summary estimate. Hollow circles represent point estimates of RR and horizontal dotted lines represent their 95% confidence intervals (CIs). The solid lines represent the point estimate of overall RR for all studies with its 95% CI.

**Figure S17.** Sensitivity analysis with summary estimate with 95% confidence interval (CI) of childhood leukemia from benzene exposure for all children after removal of single study result (leave-one-out analysis): all studies (A); by leukemia subtype (B); by exposure window, i.e. residence at birth vs. at diagnosis (C); by region/continent (D). Each given named study is omitted when computing the overall meta-analysis summary estimate. Hollow circles represent point estimates of RR and horizontal dotted lines represent their 95% confidence intervals (CIs). The solid lines represent the point estimate of overall RR for all studies with its 95% CI.

**Figure S18.** Sensitivity analysis with summary estimate with 95% confidence interval (CI) of childhood leukemia from nitrogen dioxide exposure for all children after removal of single study result (leave-one-out analysis): all studies (A); by leukemia subtype (B); by exposure window, i.e. residence at birth vs. at diagnosis (C); by region/continent (D). Each given named study is omitted when computing the overall meta-analysis summary estimate. Hollow circles represent point estimates of RR and horizontal dotted lines represent their 95% confidence intervals (CIs). The solid lines represent the point estimate of overall RR for all studies with its 95% CI.

**Figure S19.** Sensitivity analysis entering a  $\pm 15\%$  value instead of  $\pm 20$  in the dose-response meta-analysis of childhood leukemia risk from traffic indicators using vehicles per day count (A), road density in km/km<sup>2</sup> (B), and distance from a major road in meters (C). Overall spline curve (black solid line) with 95% confidence limits (black dashed lines). RR: risk ratio.

**Figure S20.** Sensitivity analysis entering a  $\pm 15\%$  value instead of  $\pm 20$  in the dose-response meta-analysis of childhood leukemia risk from benzene exposure of all leukemia (A), acute lymphoblastic leukemia only (B), and acute myeloid leukemia only (C). Overall spline curve (black solid line) with 95% confidence limits (black dashed lines). RR: risk ratio.

**Figure S21.** Sensitivity analysis entering a  $\pm 15\%$  value instead of  $\pm 20$  in the dose-response meta-analysis of childhood leukemia risk from nitrogen dioxide exposure of all leukemia (A), acute lymphoblastic leukemia only (B), and acute myeloid leukemia only (C). Overall spline curve (black solid line) with 95% confidence limits (black dashed lines). RR: risk ratio.

**Figure S22.** Funnel plots for publication bias for traffic density, benzene, nitrogen dioxide (NO<sub>2</sub>), particulate matter (PM<sub>2.5</sub>/PM<sub>10</sub>), and 1,3-butadiene indicators. Black diamonds represent studies included in each analysis, the x-axis indicates the study effect/results through its risk ratio (RR), and the y-axis indicates study precision through its standard error. The outer dashed lines indicate the triangular region within which 95% of studies are expected to lie in the absence of both biases and heterogeneity. The solid vertical line corresponds to overall summary RR from meta-analysis of included studies.

**Figure S23.** Dose-response meta-analysis of childhood leukemia risk from traffic indicators using vehicles per day count (A), road density in km/km<sup>2</sup> (B), and distance from a major road in meters (C). Overall spline curve (black solid line) with 95% confidence limits (black dashed lines) and the study-specific trends showing the influence of variation across studies (gray solid lines). RR: risk ratio.

**Figure S24.** Dose-response meta-analysis of childhood leukemia risk from benzene exposure of all leukemia (A), acute lymphoblastic leukemia only (B), and acute myeloid leukemia only (C). Overall spline curve (black solid line) with 95% confidence limits (black dashed lines) and the study-specific trends showing the influence of variation across studies (gray solid lines). RR: risk ratio.

**Figure S25.** Dose-response meta-analysis of childhood leukemia risk from NO<sub>2</sub> exposure of all leukemia (A), acute lymphoblastic leukemia only (B), and acute myeloid leukemia only (C). Overall spline curve (black solid line) with 95% confidence limits (black dashed lines) and the study-specific trends showing the influence of variation across studies (gray solid lines). RR: risk ratio.

**Additional File- Excel Document**

**References**

**Table S1.** Detailed PECOS statement used for identification of search strategies implemented on online databases.

|                                                                                                                                                                                                                                                                                                                                                                                                                                                                                   |                                                                                                                                                                                                                                                                                                                                                                                                                                                                                                                                                                                                                                                                                                                                                                                                                                                                                                                                                                                                                                                                                                                                                                                                                                                                                                                                                                                               |
|-----------------------------------------------------------------------------------------------------------------------------------------------------------------------------------------------------------------------------------------------------------------------------------------------------------------------------------------------------------------------------------------------------------------------------------------------------------------------------------|-----------------------------------------------------------------------------------------------------------------------------------------------------------------------------------------------------------------------------------------------------------------------------------------------------------------------------------------------------------------------------------------------------------------------------------------------------------------------------------------------------------------------------------------------------------------------------------------------------------------------------------------------------------------------------------------------------------------------------------------------------------------------------------------------------------------------------------------------------------------------------------------------------------------------------------------------------------------------------------------------------------------------------------------------------------------------------------------------------------------------------------------------------------------------------------------------------------------------------------------------------------------------------------------------------------------------------------------------------------------------------------------------|
| <b>(A) PECOS statement:</b>                                                                                                                                                                                                                                                                                                                                                                                                                                                       | <ul style="list-style-type: none"> <li>• <b>Population:</b> non-adult population aged less than 18 years, including infant, child and adolescent population.</li> <li>• <b>Exposure:</b> exposure to any type of traffic-related outdoor air pollutants emitted from motorized vehicles, including benzene and derivatives, particulate matter, nitrogen oxides. Any type of traffic exposure assessment was considered, including exposure through air monitoring data, dispersion models based on motorized traffic, major roads near the place of residence (assessed either using the distance of main/major roads from subjects' residence, or the density of major roads around subjects' residence), or number of cars or trucks on nearby roads (e.g. vehicle traffic count).</li> <li>• <b>Comparator:</b> non-exposed or lower exposure subjects were considered the baseline comparator for the highest versus lowest analysis. For the dose-response analysis, continuous non-linear exposure from null exposure to highest reported exposure was tested.</li> <li>• <b>Outcome:</b> any type of acute childhood leukemia, overall leukemias and the main subtypes, acute lymphoblastic leukemia (ALL) and acute myeloid leukemia (AML).</li> <li>• <b>Study design:</b> both case-control and cohort epidemiological studies were considered eligible for the review.</li> </ul> |
| <p><b>PECOS research question:</b> Among children, i.e. subjects aged less than 18 years (<u>population</u>) exposed to traffic-related air pollution, what is the effect of high exposure to outdoor pollutants (<u>exposure</u>) compared to the non-exposed or lower exposed subjects (<u>comparator</u>) in the same population on risk of childhood leukemia (<u>outcome</u>) evaluated in case-control and cohort epidemiological investigations (<u>study design</u>)?</p> |                                                                                                                                                                                                                                                                                                                                                                                                                                                                                                                                                                                                                                                                                                                                                                                                                                                                                                                                                                                                                                                                                                                                                                                                                                                                                                                                                                                               |
| <b>(B) Database</b>                                                                                                                                                                                                                                                                                                                                                                                                                                                               | <b>Search strategy</b>                                                                                                                                                                                                                                                                                                                                                                                                                                                                                                                                                                                                                                                                                                                                                                                                                                                                                                                                                                                                                                                                                                                                                                                                                                                                                                                                                                        |
| <b>PubMed</b>                                                                                                                                                                                                                                                                                                                                                                                                                                                                     | <p>((air pollution[MH] NOT air pollution, indoor[MH]) OR traffic-related pollution[MH] OR particulate matter[MH] OR particulate matter[TIAB] OR particulate matter[OT] OR benzene[MH] OR (benzene derivatives[MH] AND air pollut*) OR benzene[TIAB] OR benzene[OT] OR nitrogen oxides[MH] OR nitrogen oxides[TIAB] OR nitrogen oxides[OT] OR motor vehicle[MH] OR vehicle emission[MH] OR motor vehicle[TIAB] OR vehicle emission[TIAB] OR motor vehicle[OT] OR vehicle emission[OT]) AND ((leukemia[MH] OR leukaemia[TIAB] OR leukemia[TIAB] OR childhood leukemia[TIAB]) AND (child[MH] OR infant[MH] OR adolescent[MH] OR child[TIAB] OR infant[TIAB] OR adolescent[TIAB] OR childhood[TIAB] OR children[TIAB])) NOT ((animals [MH] OR plants [MH]) NOT humans [MH]) NOT review[PT])</p>                                                                                                                                                                                                                                                                                                                                                                                                                                                                                                                                                                                                   |
| <b>Web of Science</b>                                                                                                                                                                                                                                                                                                                                                                                                                                                             | <p>(((((TS=(air pollution) OR TI=(air pollution) ) OR (TS=(traffic) OR TI=(traffic)) OR ( TS=(benzene) OR TI=(benzene) ) OR ( TS=(nitrogen oxides) OR TI=(nitrogen oxides)) OR ( TS=(particulate matter) OR TI=(particulate matter) ) OR (TS=(vehicle emission) OR TI=(vehicle emission)) ) AND ((TS=(leukemia) OR TI=(leukemia) OR TS=(leukaemia) OR TI=(leukaemia)) OR TI=(childhood leukemia) ) AND ( TS=(child OR infant OR adolescent) OR TI=(child OR infant OR adolescent))))))</p>                                                                                                                                                                                                                                                                                                                                                                                                                                                                                                                                                                                                                                                                                                                                                                                                                                                                                                    |
| <b>Embase</b>                                                                                                                                                                                                                                                                                                                                                                                                                                                                     | <p>('air pollution'/exp OR 'traffic'/exp OR 'benzene'/exp OR 'nitrogen oxides'/exp OR 'particulate matter'/exp OR 'vehicle emission'/exp AND 'leukemia'/exp AND ('child'/exp OR 'infant'/exp OR 'adolescent'/exp) AND 'human'/exp</p>                                                                                                                                                                                                                                                                                                                                                                                                                                                                                                                                                                                                                                                                                                                                                                                                                                                                                                                                                                                                                                                                                                                                                         |

**Table S2.** Newcastle - Ottawa quality assessment scale for included studies: details used for study score assignment. High quality choices are identified with a 'star' (i.e. asterisk). A maximum of one 'star' for each item within the 'Selection' and 'Exposure/Outcome' categories; maximum of two 'stars' for 'Comparability' can be identified.

| <b>(A) Newcastle - Ottawa quality assessment scale</b>                                                                                                                                                                                                                                                                                                                                                                                                                                                                                                                                                                                                                                                                                                                                                                                                                                                                                                                                                                                                                                                                                                                                                                                                                                                                                                                                                                                                                                                                                                                                                                                                                                                                                                                                                                                                                                                                                                                         |                                                                                                                                                                                                                                                                                                                                                                                                                                                                                                                                                                                                                                                                                                                                                                                                                                                                                                                                                                                                                                                                                                                                                                                                                                                                                                                                                                                                                                                                                                                                                                                                                                                                                                                                                                                                                                                                                                                                            |
|--------------------------------------------------------------------------------------------------------------------------------------------------------------------------------------------------------------------------------------------------------------------------------------------------------------------------------------------------------------------------------------------------------------------------------------------------------------------------------------------------------------------------------------------------------------------------------------------------------------------------------------------------------------------------------------------------------------------------------------------------------------------------------------------------------------------------------------------------------------------------------------------------------------------------------------------------------------------------------------------------------------------------------------------------------------------------------------------------------------------------------------------------------------------------------------------------------------------------------------------------------------------------------------------------------------------------------------------------------------------------------------------------------------------------------------------------------------------------------------------------------------------------------------------------------------------------------------------------------------------------------------------------------------------------------------------------------------------------------------------------------------------------------------------------------------------------------------------------------------------------------------------------------------------------------------------------------------------------------|--------------------------------------------------------------------------------------------------------------------------------------------------------------------------------------------------------------------------------------------------------------------------------------------------------------------------------------------------------------------------------------------------------------------------------------------------------------------------------------------------------------------------------------------------------------------------------------------------------------------------------------------------------------------------------------------------------------------------------------------------------------------------------------------------------------------------------------------------------------------------------------------------------------------------------------------------------------------------------------------------------------------------------------------------------------------------------------------------------------------------------------------------------------------------------------------------------------------------------------------------------------------------------------------------------------------------------------------------------------------------------------------------------------------------------------------------------------------------------------------------------------------------------------------------------------------------------------------------------------------------------------------------------------------------------------------------------------------------------------------------------------------------------------------------------------------------------------------------------------------------------------------------------------------------------------------|
| <p><b>Selection (for case-control studies)</b></p> <p>1) Is the case definition adequate?</p> <ul style="list-style-type: none"> <li>a) yes, with independent validation*</li> <li>b) yes, e.g., record linkage or based on self-report</li> <li>c) no description</li> </ul> <p>2) Representativeness of the cases</p> <ul style="list-style-type: none"> <li>a) consecutive or obviously representative series of cases*</li> <li>b) potential for selection biases or not stated</li> </ul> <p>3) Selection of Controls</p> <ul style="list-style-type: none"> <li>a) community controls*</li> <li>b) hospital controls</li> <li>c) no description or not representative of the population</li> </ul> <p>4) Definition of Controls</p> <ul style="list-style-type: none"> <li>a) no history of disease (endpoint)*</li> <li>b) no description of source</li> </ul> <p><b>Selection (for cohort studies)</b></p> <p>1) Representativeness of the exposed cohort</p> <ul style="list-style-type: none"> <li>a) truly representative of the average children population in the community*</li> <li>b) somewhat representative of the average children population in the community</li> <li>c) selected group of users, e.g. volunteers</li> <li>d) no description of the derivation of the cohort</li> </ul> <p>2) Selection of the non-exposed cohort</p> <ul style="list-style-type: none"> <li>a) drawn from the same community as the exposed cohort*</li> <li>b) drawn from a different source</li> <li>c) no description of the derivation of the not exposed cohort</li> </ul> <p>3) Ascertainment of exposure</p> <ul style="list-style-type: none"> <li>a) secure record (e.g. surgical records)*</li> <li>b) structured interview*</li> <li>c) written self-report</li> <li>d) no description</li> </ul> <p>4) Demonstration that outcome of interest was not present at start of study</p> <ul style="list-style-type: none"> <li>a) yes*</li> <li>b) no</li> </ul> | <p><b>Comparability (both case-control and cohort studies)</b></p> <p>1) Comparability of cases and controls/cohorts on the basis of the design or analysis: (yes/no answer)</p> <ul style="list-style-type: none"> <li>- study controls for age (y*/n)</li> <li>- study controls for socio-economic status (y*/n)</li> </ul> <p><b>Exposure (for case-control studies)</b></p> <p>1) Ascertainment of exposure</p> <ul style="list-style-type: none"> <li>a) secure record (e.g. surgical records)*</li> <li>b) structured interview where blind to case/control status*</li> <li>c) interview not blinded to case/control status</li> <li>d) written self-report or medical record only</li> <li>e) no description</li> </ul> <p>2) Same method of ascertainment for cases and controls</p> <ul style="list-style-type: none"> <li>a) yes*</li> <li>b) no</li> </ul> <p>3) Non-response rate</p> <ul style="list-style-type: none"> <li>a) same rate for both groups*</li> <li>b) non-respondents described</li> <li>c) rate different and no designation</li> </ul> <p><b>Outcome (for cohort studies)</b></p> <p>1) Assessment of outcome</p> <ul style="list-style-type: none"> <li>a) independent blind assessment*</li> <li>b) record linkage*</li> <li>c) self-report</li> <li>d) no description</li> </ul> <p>2) Was follow-up long enough for outcomes to occur</p> <ul style="list-style-type: none"> <li>a) yes (5 years of follow up period was considered adequate for children diagnosed before 5, and 10 years if diagnosed before 15)*</li> <li>b) no</li> </ul> <p>3) Adequacy of follow up of cohorts</p> <ul style="list-style-type: none"> <li>a) complete follow up accounted for <b>100% of subjects*</b></li> <li>b) subjects lost to follow up unlikely to introduce bias – <b>lost at follow-up ≤5%*</b></li> <li>c) follow up rate &lt;95% and no description of those lost</li> <li>d) no statement</li> </ul> |

**Table S3.** Newcastle - Ottawa quality assessment scale (NOS) for included studies: details of score assignment for each included study, divided according to case-control and cohort study design. S-1 through S-4 correspond to the 'Selection' questions, C-1 and C-2 correspond to the 'Comparability' questions, E-1 through E-3 correspond to the 'Exposure' questions, and O-1 through O-3 correspond to the 'Outcome' questions reported in Table S2. Letters stand for answers to each question reported in Table S2, and number in parenthesis indicate if the given answer identified a high (1) or low (0) quality rank. Total score is the sum of the score for each answer to the NOS scale. A high score indicates that the study is of high quality.

| Reference                      | Selection                   |       |       |       | Comparability |       | Exposure/Outcome |       |       | Total Score |
|--------------------------------|-----------------------------|-------|-------|-------|---------------|-------|------------------|-------|-------|-------------|
|                                | <i>Case-control studies</i> | S-1   | S-2   | S-3   | S-4           | C-1   | C-2              | E-1   | E-2   |             |
| (Abdul Rahman et al. 2008)     | a (1)                       | b (0) | b (0) | a (1) | n (0)         | y (1) | c (0)            | a (1) | a (1) | 5           |
| (Amigou et al. 2011)           | a (1)                       | b (0) | c (0) | a (1) | y (1)         | y (1) | a (1)            | a (1) | a (1) | 7           |
| (Badaloni et al. 2013)         | a (1)                       | b (0) | c (0) | a (1) | y (1)         | y (1) | c (0)            | a (1) | a (1) | 6           |
| (Crosignani et al. 2004)       | a (1)                       | a (1) | a (1) | a (1) | y (1)         | y (1) | a (1)            | a (1) | a (1) | 9           |
| (Feychting et al. 1998)        | a (1)                       | a (1) | a (1) | a (1) | y (1)         | y (1) | a (1)            | a (1) | a (1) | 9           |
| (Ghosh et al. 2013)            | a (1)                       | a (1) | a (1) | a (1) | y (1)         | y (1) | a (1)            | a (1) | a (1) | 9           |
| (Harrison et al. 1999)         | a (1)                       | a (1) | b (0) | a (1) | n (0)         | n (0) | a (1)            | a (1) | a (1) | 6           |
| (Heck et al. 2013)             | a (1)                       | a (1) | a (1) | a (1) | y (1)         | y (1) | a (1)            | a (1) | a (1) | 9           |
| (Heck et al. 2014)             | a (1)                       | a (1) | a (1) | a (1) | y (1)         | y (1) | a (1)            | a (1) | a (1) | 9           |
| (Houot et al. 2015)            | a (1)                       | a (1) | a (1) | a (1) | y (1)         | y (1) | a (1)            | a (1) | a (1) | 9           |
| (Janitz et al. 2016)           | a (1)                       | a (1) | a (1) | a (1) | y (1)         | y (1) | a (1)            | a (1) | a (1) | 9           |
| (Janitz et al. 2017)           | a (1)                       | a (1) | a (1) | a (1) | y (1)         | y (1) | a (1)            | a (1) | a (1) | 9           |
| (Langholz et al. 2002)         | a (1)                       | a (1) | c (0) | a (1) | y (1)         | n (0) | a (1)            | a (1) | a (1) | 7           |
| (Magnani et al. 2016)          | a (1)                       | b (0) | c (0) | a (1) | y (1)         | y (1) | c (0)            | a (1) | a (1) | 6           |
| (Pearson et al. 2000)          | a (1)                       | b (0) | a (1) | a (1) | y (1)         | y (1) | a (1)            | a (1) | c (0) | 7           |
| (Raaschou-Nielsen et al. 2001) | a (1)                       | a (1) | a (1) | a (1) | y (1)         | y (1) | a (1)            | a (1) | a (1) | 9           |
| (Raaschou-Nielsen et al. 2018) | a (1)                       | a (1) | a (1) | a (1) | y (1)         | y (1) | a (1)            | a (1) | a (1) | 9           |
| (Reynolds et al. 2001)         | a (1)                       | a (1) | a (1) | a (1) | y (1)         | y (1) | a (1)            | a (1) | a (1) | 9           |
| (Reynolds et al. 2004)         | a (1)                       | a (1) | a (1) | a (1) | y (1)         | y (1) | a (1)            | a (1) | a (1) | 9           |
| (Savitz and Feingold 1989)     | a (1)                       | b (0) | a (1) | a (1) | y (1)         | y (1) | a (1)            | a (1) | c (0) | 7           |
| (Steffen et al. 2004)          | a (1)                       | a (1) | b (0) | a (1) | y (1)         | y (1) | b (0)            | a (1) | a (1) | 7           |
| (Symanski et al. 2016)         | a (1)                       | a (1) | a (1) | a (1) | y (1)         | y (1) | a (1)            | a (1) | a (1) | 9           |
| (Tamayo-Uria et al. 2018)      | a (1)                       | a (1) | a (1) | a (1) | y (1)         | y (1) | a (1)            | b (0) | a (1) | 8           |
| (Vinceti et al. 2012)          | a (1)                       | a (1) | a (1) | a (1) | y (1)         | y (1) | a (1)            | a (1) | a (1) | 9           |
| (Von Behren et al. 2008)       | a (1)                       | b (0) | a (1) | a (1) | y (1)         | y (1) | a (1)            | a (1) | a (1) | 8           |
| (Weng et al. 2008)             | a (1)                       | b (0) | a (1) | a (1) | y (1)         | n (0) | a (1)            | a (1) | a (1) | 7           |
| <i>Cohort studies</i>          | S-1                         | S-2   | S-3   | S-4   | C-1           | C-2   | O-1              | O-2   | O-3   |             |
| (Lavigne et al. 2017)          | a (1)                       | a (1) | a (1) | a (1) | y (1)         | y (1) | b (1)            | a (1) | a (1) | 9           |
| (Spycher et al. 2015)          | a (1)                       | a (1) | a (1) | a (1) | y (1)         | y (1) | b (1)            | b (1) | a (1) | 9           |
| (Visser et al. 2004)           | a (1)                       | a (1) | a (1) | a (1) | y (1)         | n (0) | b (1)            | a (1) | a (1) | 8           |

**Table S4.** Summary risk ratios (RR) of childhood leukemia in the highest exposure category versus the lowest one for traffic density, benzene and nitrogen dioxide (NO<sub>2</sub>) exposure, for all studies and stratified by age at diagnosis, leukemia subtype, exposure timing, and region. Results of leave-one-out sensitivity analysis of range of summary RR ('min RR' and 'max RR') investigating the influence of each individual study on the overall meta-analysis summary estimates.

| Indicator              | All children |      |              |        |        | Pre-school children (<6 years) |      |               |        |        | Children ≥ 6 years |      |              |        |        |
|------------------------|--------------|------|--------------|--------|--------|--------------------------------|------|---------------|--------|--------|--------------------|------|--------------|--------|--------|
|                        | n            | RR   | 95% CI       | min RR | max RR | n                              | RR   | 95% CI        | min RR | max RR | n                  | RR   | 95% CI       | min RR | max RR |
| <b>Traffic density</b> |              |      |              |        |        |                                |      |               |        |        |                    |      |              |        |        |
| All leukemia           | 16           | 1.09 | (1.00, 1.20) | 1.07   | 1.15   | 7                              | 1.00 | (0.93, 1.09)  | 0.98   | 1.03   | 3                  | 1.05 | (0.96, 1.15) | 1.02   | 1.10   |
| Subtype                |              |      |              |        |        |                                |      |               |        |        |                    |      |              |        |        |
| ALL                    | 9            | 1.05 | (0.96, 1.16) | 1.03   | 1.15   | 3                              | 1.02 | (0.99, 1.05)  | 1.01   | 1.02   | 1                  | 1.00 | (0.92, 1.09) | -      | -      |
| AML                    | 5            | 1.09 | (0.86, 1.38) | 0.99   | 1.21   | 2                              | 1.03 | (0.77, 1.38)  | 0.89   | 1.20   | 1                  | 1.25 | (1.02, 1.53) | -      | -      |
| Exposure timing        |              |      |              |        |        |                                |      |               |        |        |                    |      |              |        |        |
| At birth               | 5            | 0.98 | (0.90, 1.06) | 0.92   | 1.03   | 4                              | 0.95 | (0.85, 1.05)  | 0.89   | 1.00   | 1                  | 1.15 | (0.78, 1.70) | -      | -      |
| At diagnosis           | 14           | 1.32 | (1.12, 1.55) | 1.25   | 1.41   | 3                              | 1.27 | (0.95, 1.71)  | 1.11   | 2.17   | 2                  | 1.05 | (0.94, 1.17) | 1.01   | 1.11   |
| Region                 |              |      |              |        |        |                                |      |               |        |        |                    |      |              |        |        |
| Asia                   | 1            | 1.27 | (0.51, 3.17) | -      | -      | -                              | -    | -             | -      | -      | -                  | -    | -            | -      | -      |
| Europe                 | 9            | 1.25 | (1.05, 1.49) | 1.18   | 1.36   | 3                              | 1.05 | (0.87, 1.25)  | 0.98   | 1.11   | 1                  | 1.05 | (0.95, 1.17) | -      | -      |
| North America          | 6            | 1.02 | (0.89, 1.16) | 0.99   | 1.07   | 4                              | 0.98 | (0.84, 1.15)  | 0.96   | 1.05   | 2                  | 1.09 | (0.72, 1.64) | 0.92   | 1.16   |
| <b>Benzene</b>         |              |      |              |        |        |                                |      |               |        |        |                    |      |              |        |        |
| All leukemia           | 7            | 1.27 | (1.03, 1.56) | 1.22   | 1.36   | 4                              | 1.39 | (1.03, 1.87)  | 1.22   | 1.66   | 2                  | 1.08 | (0.64, 1.82) | 0.93   | 1.16   |
| Subtype                |              |      |              |        |        |                                |      |               |        |        |                    |      |              |        |        |
| ALL                    | 7            | 1.09 | (0.88, 1.36) | 1.03   | 1.18   | 3                              | 1.19 | (1.00, 1.40)  | 1.17   | 1.38   | 1                  | 0.69 | (0.27, 1.78) | -      | -      |
| AML                    | 5            | 1.84 | (1.31, 2.59) | 1.76   | 1.56   | 2                              | 3.21 | (1.39, 7.42)  | 2.61   | 5.46   | 1                  | 0.43 | (0.04, 4.79) | -      | -      |
| Exposure timing        |              |      |              |        |        |                                |      |               |        |        |                    |      |              |        |        |
| At birth               | 3            | 1.21 | (1.04, 1.41) | 1.19   | 1.38   | 3                              | 1.22 | (1.03, 1.43)  | 1.19   | 1.52   | 1                  | 1.14 | (0.63, 2.08) | -      | -      |
| At diagnosis           | 4            | 1.36 | (0.92, 2.00) | 1.17   | 1.56   | 1                              | 3.30 | (1.03, 10.59) | -      | -      | 1                  | 0.90 | (0.31, 2.60) | -      | -      |
| Region                 |              |      |              |        |        |                                |      |               |        |        |                    |      |              |        |        |
| Asia                   | -            | -    | -            | -      | -      | -                              | -    | -             | -      | -      | -                  | -    | -            | -      | -      |
| Europe                 | 4            | 1.36 | (0.92, 2.00) | 1.17   | 1.56   | 1                              | 3.30 | (1.03, 10.59) | -      | -      | 1                  | 0.90 | (0.31, 2.60) | -      | -      |
| North America          | 3            | 1.21 | (1.04, 1.41) | 1.19   | 1.38   | 3                              | 1.22 | (1.03, 1.43)  | 1.19   | 1.52   | 1                  | 1.14 | (0.63, 2.08) | -      | -      |
| <b>NO<sub>2</sub></b>  |              |      |              |        |        |                                |      |               |        |        |                    |      |              |        |        |
| All leukemia           | 8            | 1.04 | (0.90, 1.19) | 0.98   | 1.07   | 4                              | 1.03 | (0.90, 1.18)  | 0.98   | 1.06   | 1                  | 0.89 | (0.42, 1.89) | -      | -      |
| Subtype                |              |      |              |        |        |                                |      |               |        |        |                    |      |              |        |        |
| ALL                    | 4            | 1.02 | (0.89, 1.18) | 0.95   | 1.08   | 2                              | 1.10 | (0.92, 1.32)  | 1.02   | 1.23   | -                  | -    | -            | -      | -      |
| AML                    | 4            | 0.97 | (0.79, 1.19) | 0.92   | 1.01   | 2                              | 0.86 | (0.60, 1.23)  | 0.71   | 0.95   | -                  | -    | -            | -      | -      |
| Exposure timing        |              |      |              |        |        |                                |      |               |        |        |                    |      |              |        |        |
| At birth               | 4            | 1.07 | (0.96, 1.19) | 1.02   | 1.12   | 4                              | 1.03 | (0.90, 1.18)  | 0.98   | 1.06   | 1                  | 0.89 | (0.42, 1.89) | -      | -      |
| At diagnosis           | 4            | 1.17 | (0.82, 1.67) | 0.92   | 1.36   | -                              | -    | -             | -      | -      | -                  | -    | -            | -      | -      |
| Region                 |              |      |              |        |        |                                |      |               |        |        |                    |      |              |        |        |
| Asia                   | 1            | 2.29 | (1.44, 3.64) | -      | -      | -                              | -    | -             | -      | -      | -                  | -    | -            | -      | -      |
| Europe                 | 4            | 0.91 | (0.82, 1.00) | 0.90   | 0.94   | 1                              | 0.79 | (0.52, 1.20)  | -      | -      | -                  | -    | -            | -      | -      |
| North America          | 3            | 1.06 | (0.95, 1.18) | 1.00   | 1.09   | 3                              | 1.06 | (0.94, 1.19)  | 1.01   | 1.10   | 1                  | 0.89 | (0.42, 1.89) | -      | -      |

Note: ALL, acute lymphoblastic leukemia; AML, acute myeloid leukemia; CI, confidence interval; n, number of studies; RR, risk ratio.

**Table S5.** Summary risk ratios (RR) for association of childhood leukemia with particulate matter (PM<sub>2.5</sub>/PM<sub>10</sub>) and 1,3-butadiene comparing the highest versus the lowest exposure categories for all studies, and stratified by age at diagnosis, leukemia subtype, exposure timing, and region. Results of leave-one-out sensitivity analysis of range of summary RR ('min RR' and 'max RR') investigating the influence of each individual study on the overall meta-analysis summary estimates.

| Indicator               | All children |      |              |        |        | Pre-school children (<6 years) |      |              |        |        | Children ≥ 6 years |      |              |        |        |
|-------------------------|--------------|------|--------------|--------|--------|--------------------------------|------|--------------|--------|--------|--------------------|------|--------------|--------|--------|
|                         | n            | RR   | 95% CI       | min RR | max RR | n                              | RR   | 95% CI       | min RR | max RR | n                  | RR   | 95% CI       | min RR | max RR |
| <b>PM<sub>2.5</sub></b> |              |      |              |        |        |                                |      |              |        |        |                    |      |              |        |        |
| All leukemia            | 3            | 1.05 | (0.94, 1.16) | 1.02   | 1.06   | 3                              | 1.04 | (0.94, 1.16) | 1.01   | 1.06   | -                  |      |              |        |        |
| Subtype                 |              |      |              |        |        |                                |      |              |        |        |                    |      |              |        |        |
| ALL                     | 2            | 1.11 | (0.95, 1.31) | 1.10   | 1.20   | 2                              | 1.11 | (0.95, 1.31) | 1.10   | 1.20   | -                  |      |              |        |        |
| AML                     | 2            | 1.00 | (0.87, 1.13) | 0.85   | 1.03   | 2                              | 1.00 | (0.87, 1.13) | 0.85   | 1.03   | -                  |      |              |        |        |
| Exposure timing         |              |      |              |        |        |                                |      |              |        |        |                    |      |              |        |        |
| At birth                | 3            | 1.05 | (0.94, 1.16) | 1.02   | 1.06   | 3                              | 1.04 | (0.94, 1.16) | 1.01   | 1.06   | -                  |      |              |        |        |
| At diagnosis            | -            |      |              |        |        | -                              |      |              |        |        | -                  |      |              |        |        |
| Region                  |              |      |              |        |        |                                |      |              |        |        |                    |      |              |        |        |
| Europe                  | 1            | 1.00 | (0.72, 1.39) | -      | -      | 1                              | 0.94 | (0.62, 1.43) | -      | -      | -                  |      |              |        |        |
| North America           | 2            | 1.05 | (0.94, 1.17) | 1.02   | 1.07   | 2                              | 1.05 | (0.94, 1.17) | 1.02   | 1.07   | -                  |      |              |        |        |
| <b>PM<sub>10</sub></b>  |              |      |              |        |        |                                |      |              |        |        |                    |      |              |        |        |
| All leukemia            | 2            | 1.20 | (0.70, 2.04) | 1.00   | 1.80   | 2                              | 1.09 | (0.66, 1.80) | 0.97   | 1.90   | 1                  | 1.50 | (0.48, 4.70) | -      | -      |
| Subtype                 |              |      |              |        |        |                                |      |              |        |        |                    |      |              |        |        |
| ALL                     | 1            | 1.45 | (0.73, 2.87) | -      | -      | 1                              | 1.50 | (0.52, 4.33) | -      | -      | 1                  | 1.39 | (0.54, 3.57) | -      | -      |
| AML                     | 1            | 1.30 | (0.41, 4.14) | -      | -      | 1                              | 1.21 | (0.18, 8.16) | -      | -      | 1                  | 1.18 | (0.25, 5.56) | -      | -      |
| Exposure timing         |              |      |              |        |        |                                |      |              |        |        |                    |      |              |        |        |
| At birth                | 1            | 1.00 | (0.70, 1.42) | -      | -      | 1                              | 0.97 | (0.62, 1.51) | -      | -      | -                  |      |              |        |        |
| At diagnosis            | 1            | 1.80 | (0.82, 3.97) | -      | -      | 1                              | 1.90 | (0.60, 6.01) | -      | -      | 1                  | 1.50 | (0.48, 4.70) | -      | -      |
| Region                  |              |      |              |        |        |                                |      |              |        |        |                    |      |              |        |        |
| Europe                  | 2            | 1.20 | (0.70, 2.04) | 1.00   | 1.80   | 2                              | 1.09 | (0.66, 1.80) | 0.97   | 1.90   | 1                  | 1.50 | (0.48, 4.70) | -      | -      |
| North America           | -            |      |              |        |        | -                              |      |              |        |        | -                  |      |              |        |        |
| <b>1,3-butadiene</b>    |              |      |              |        |        |                                |      |              |        |        |                    |      |              |        |        |
| All leukemia            | 2            | 1.45 | (1.08, 1.95) | 1.31   | 1.91   | 2                              | 1.45 | (1.08, 1.95) | 1.31   | 1.91   | -                  |      |              |        |        |
| Subtype                 |              |      |              |        |        |                                |      |              |        |        |                    |      |              |        |        |
| ALL                     | 2            | 1.31 | (1.11, 1.54) | 1.28   | 1.73   | 2                              | 1.31 | (1.11, 1.54) | 1.28   | 1.73   | -                  |      |              |        |        |
| AML                     | 1            | 2.35 | (1.02, 5.40) | -      | -      | 1                              | 2.35 | (1.02, 5.40) | -      | -      | -                  |      |              |        |        |
| Exposure timing         |              |      |              |        |        |                                |      |              |        |        |                    |      |              |        |        |
| At birth                | 2            | 1.45 | (1.08, 1.95) | 1.31   | 1.91   | 2                              | 1.45 | (1.08, 1.95) | 1.31   | 1.91   |                    |      |              |        |        |
| At diagnosis            | -            |      |              |        |        | -                              |      |              |        |        |                    |      |              |        |        |
| Region                  |              |      |              |        |        |                                |      |              |        |        |                    |      |              |        |        |
| Europe                  | -            |      |              |        |        | -                              |      |              |        |        | -                  |      |              |        |        |
| North America           | 2            | 1.45 | (1.08, 1.95) | 1.31   | 1.91   | 2                              | 1.45 | (1.08, 1.95) | 1.31   | 1.91   | -                  |      |              |        |        |

Note: ALL, acute lymphoblastic leukemia; AML, acute myeloid leukemia; CI, confidence interval; n, number of studies; RR, risk ratio.

A

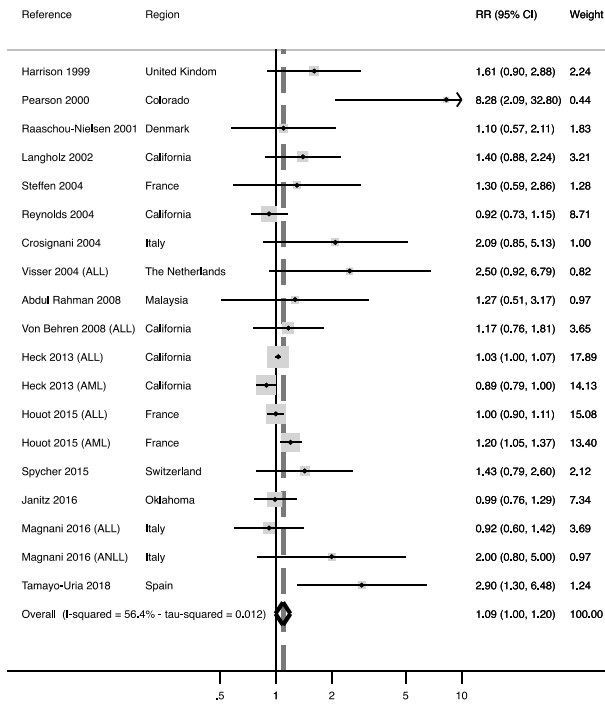

B

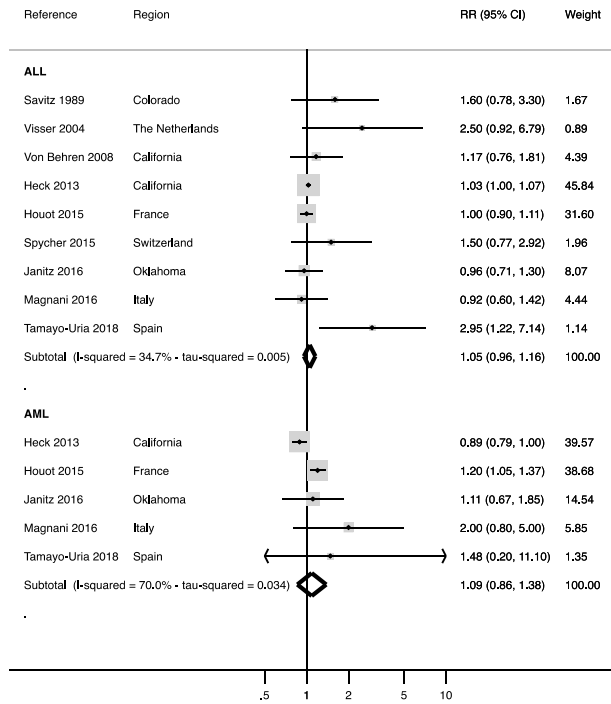

C

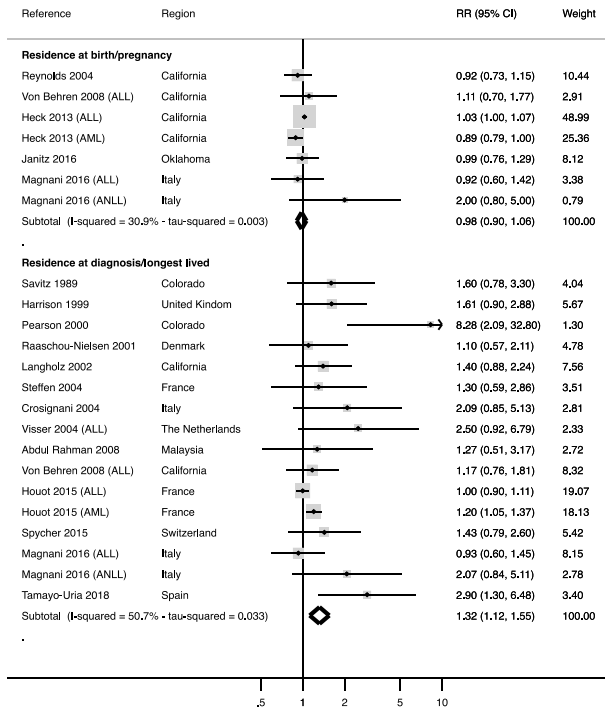

D

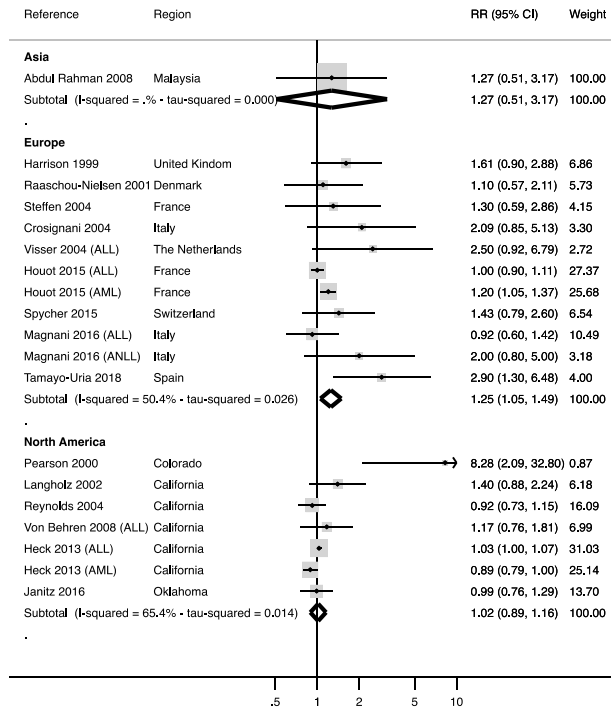

**Figure S1.** Risk ratio (RR) of childhood leukemia from indicators of traffic exposure for all children: all studies (A); by leukemia subtype (B); by exposure window, i.e. residence at birth vs. at diagnosis (C); by region/continent (D). The area of each gray square is proportional to the inverse of the variance of the estimated log RR. Black diamonds represent point estimates of RR and horizontal lines represent their 95% confidence intervals (CIs). The open diamonds represent the combined RR for each subgroup and the overall RR for all studies. The solid line represents RR=1. The dash line represents the point estimate of overall RR for all studies.



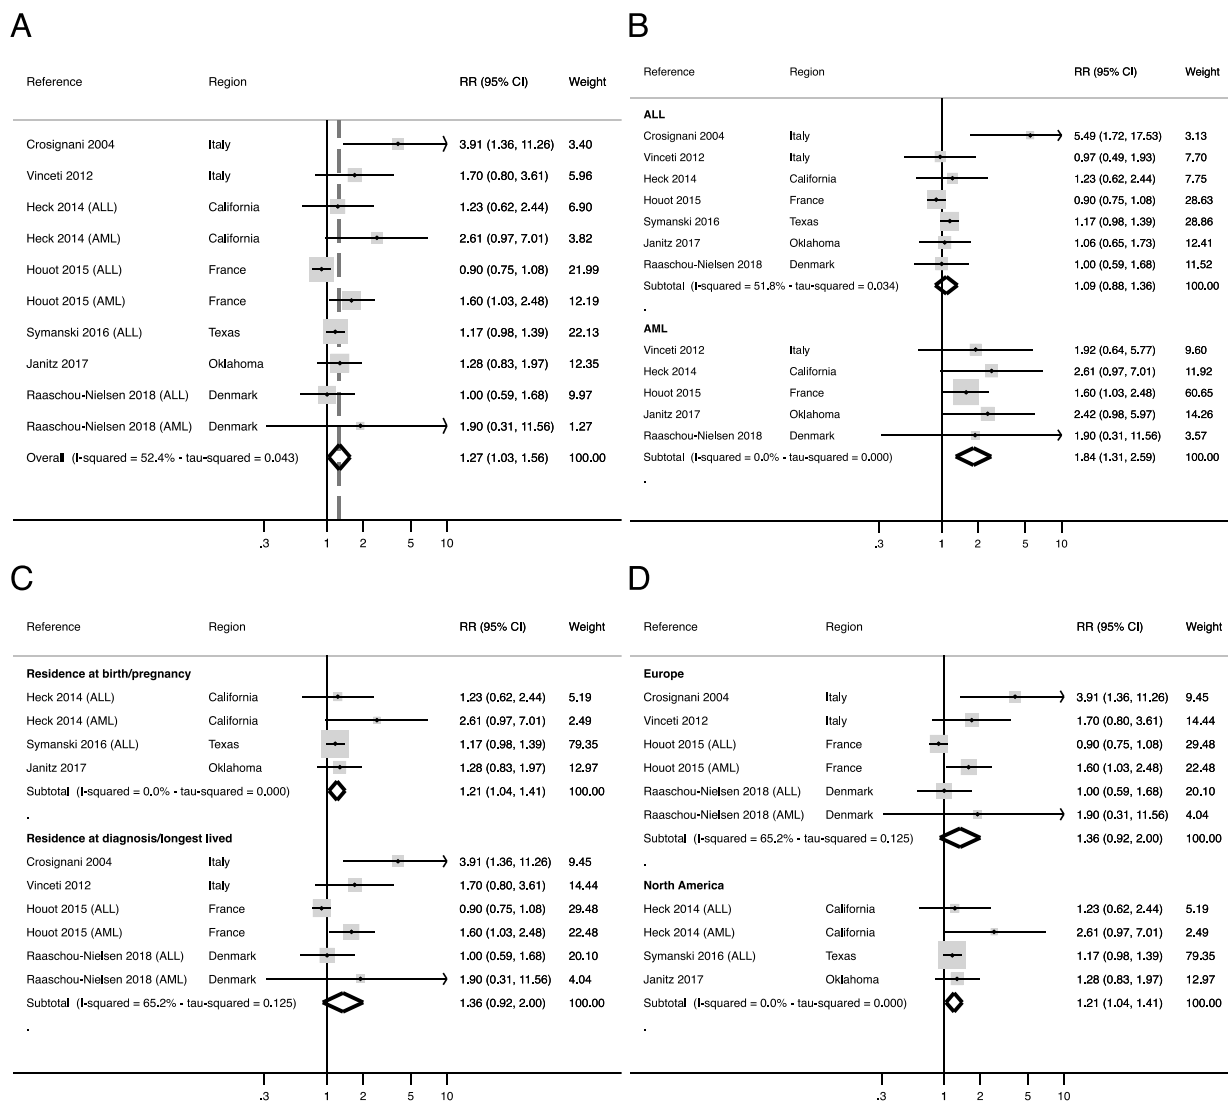

**Figure S2.** Risk ratio (RR) of childhood leukemia and leukemia subtype from benzene exposure for all children: all studies (A); by leukemia subtype (B); by exposure window, i.e. residence at birth vs. at diagnosis (C); by region/continent (D). The area of each gray square is proportional to the inverse of the variance of the estimated log RR. Black diamonds represent point estimates of RR and horizontal lines represent their 95% confidence intervals (CIs). The open diamonds represent the combined RR for each subgroup and the overall RR for all studies. The solid line represents RR=1. The dash line represents the point estimate of overall RR for all studies.

**A**

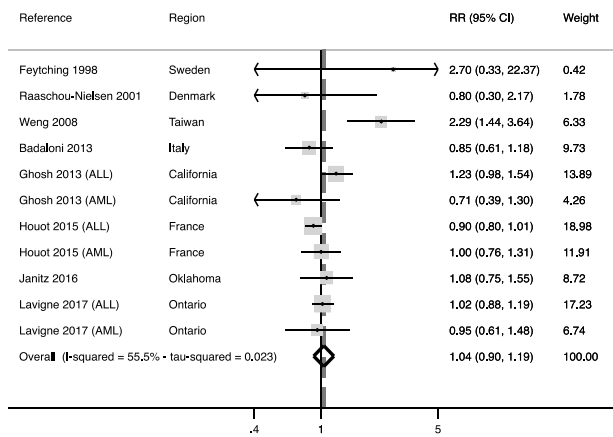

**B**

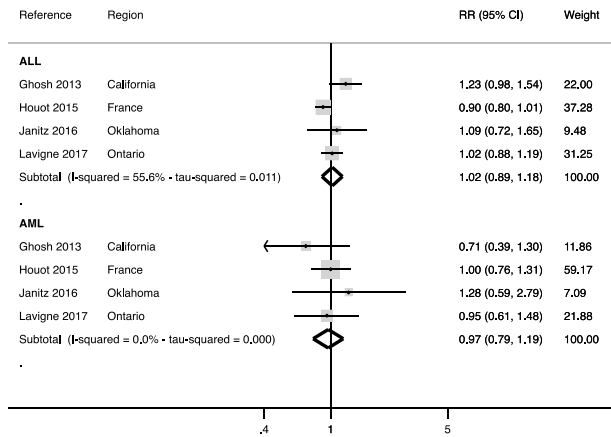

**C**

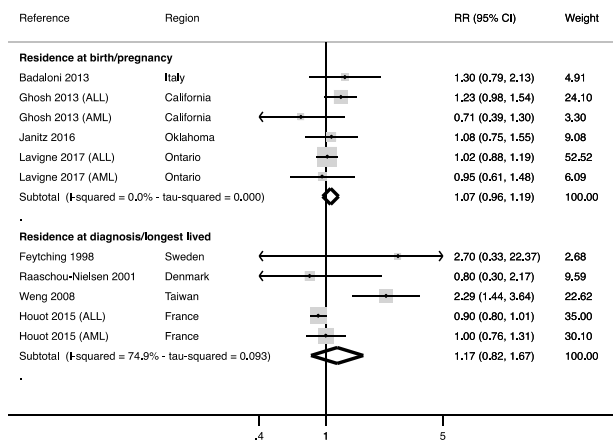

**D**

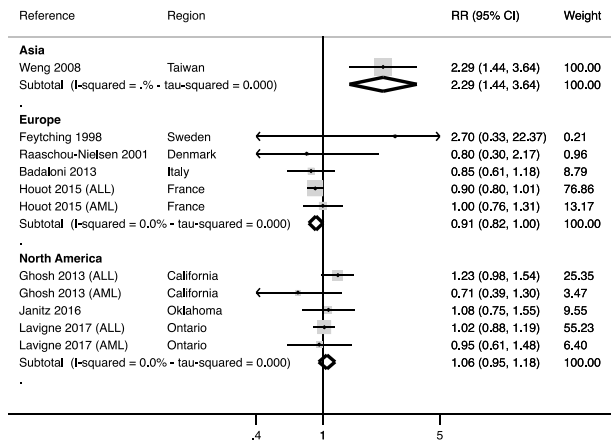

**Figure S3.** Risk ratio (RR) of childhood leukemia and leukemia subtype from air NO<sub>2</sub> exposure for all children: all studies (A); by leukemia subtype (B); by exposure window, i.e. residence at birth vs. at diagnosis (C); by region/continent (D). The area of each gray square is proportional to the inverse of the variance of the estimated log RR. Black diamonds represent point estimates of RR and horizontal lines represent their 95% confidence intervals (CIs). The open diamonds represent the combined RR for each subgroup and the overall RR for all studies. The solid line represents RR=1. The dash line represents the point estimate of overall RR for all studies.

A

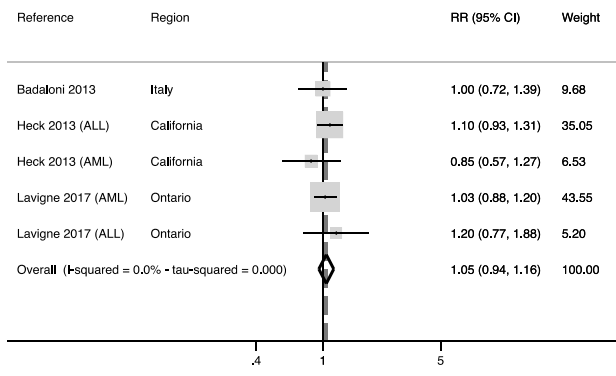

B

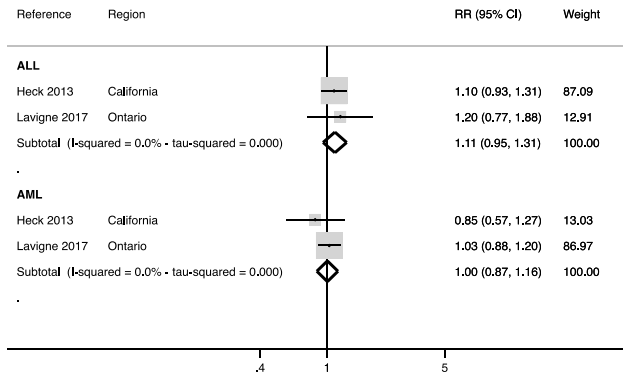

C

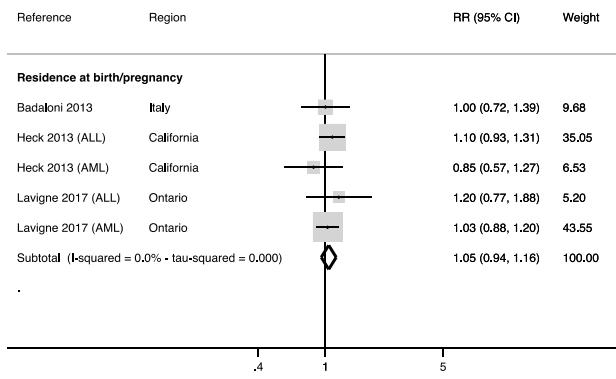

D

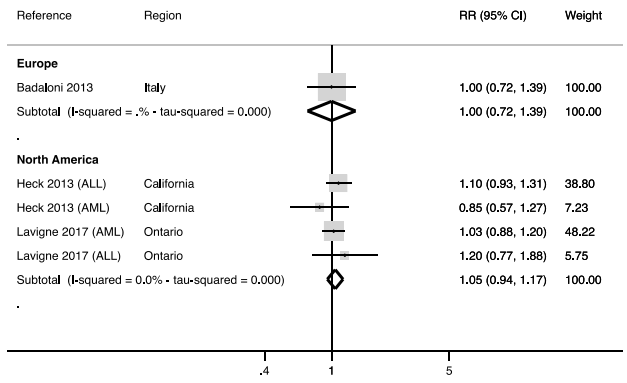

**Figure S4.** Risk ratio (RR) with 95% confidence interval (CI) of childhood leukemia from particulate matter (PM<sub>2.5</sub>) for all children: all studies (A); by leukemia subtype (B); by exposure window, i.e. residence at birth vs. at diagnosis (C); by region/continent (D). The area of each gray square is proportional to the inverse of the variance of the estimated log RR. Black diamonds represent point estimates of RR and horizontal lines represent their 95% confidence intervals (CIs). The open diamonds represent the combined RR for each subgroup and the overall RR for all studies. The solid line represents RR=1. The dash line represents the point estimate of overall RR for all studies.

A

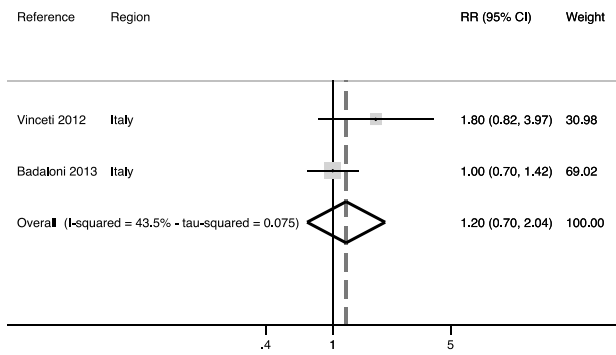

B

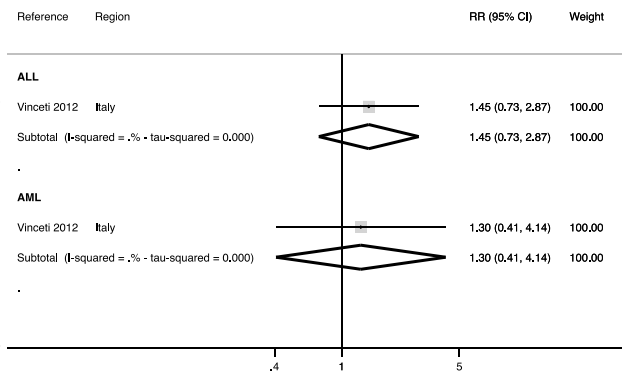

C

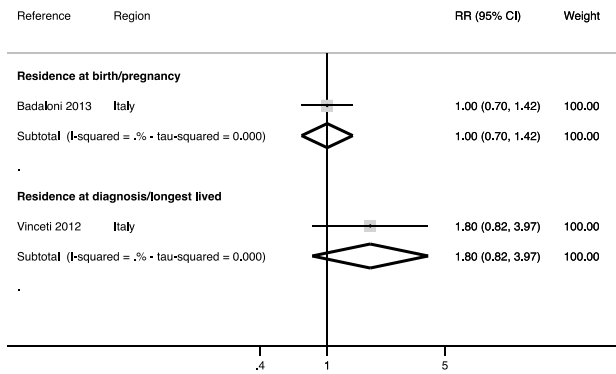

D

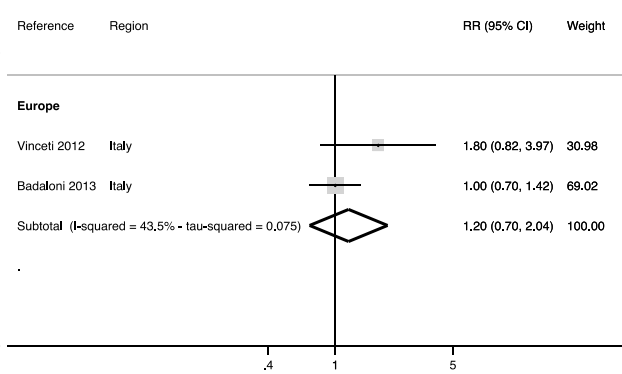

**Figure S5.** Risk ratio (RR) with 95% confidence interval (CI) of childhood leukemia from particulate matter (PM<sub>10</sub>) for all children: all studies (A); by leukemia subtype (B); by exposure window, i.e. residence at birth vs. at diagnosis (C); by region/continent (D). The area of each gray square is proportional to the inverse of the variance of the estimated log RR. Black diamonds represent point estimates of RR and horizontal lines represent their 95% confidence intervals (CIs). The open diamonds represent the combined RR for each subgroup and the overall RR for all studies. The solid line represents RR=1. The dash line represents the point estimate of overall RR for all studies.

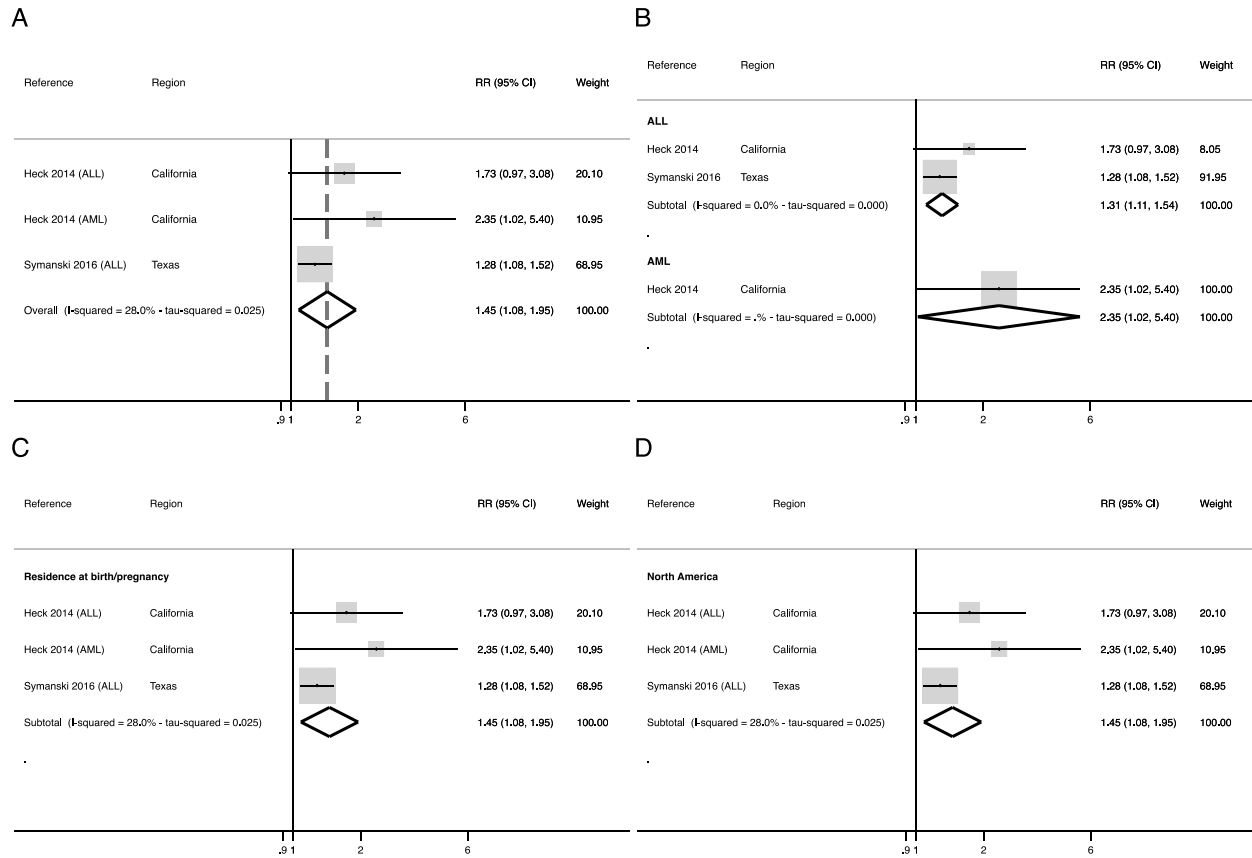

**Figure S6.** Risk ratio (RR) of childhood leukemia and leukemia subtype from 1,3-butadiene exposure for all children (all pre-school, i.e. <6 years): all studies (A); by leukemia subtype (B); by exposure window, i.e. residence at birth vs. at diagnosis (C); by region/continent (D). The area of each gray square is proportional to the inverse of the variance of the estimated log RR. Black diamonds represent point estimates of RR and horizontal lines represent their 95% confidence intervals (CIs). The open diamonds represent the combined RR for each subgroup and the overall RR for all studies. The solid line represents RR=1. The dash line represents the point estimate of overall RR for all studies.

A

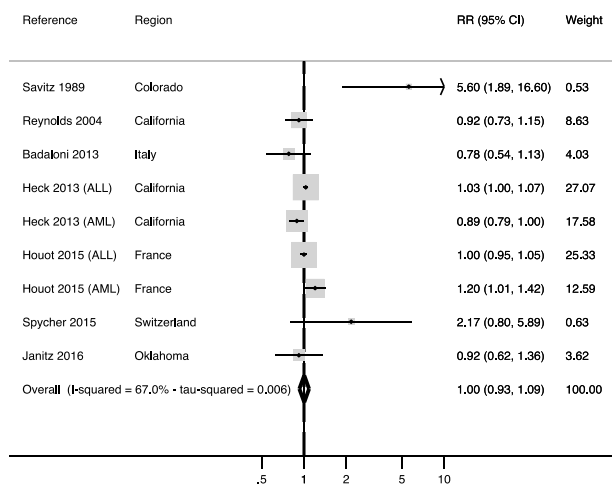

B

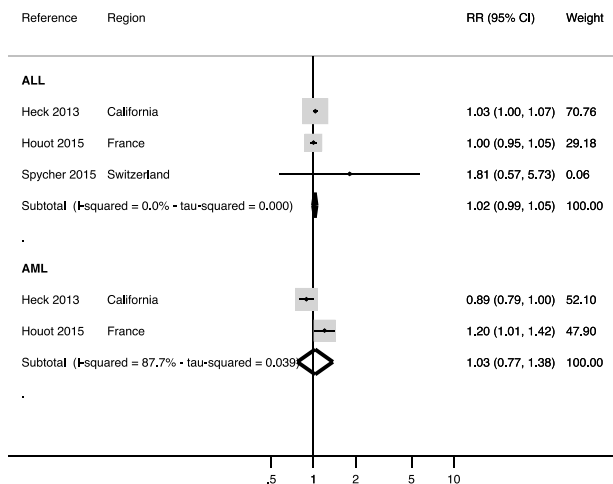

C

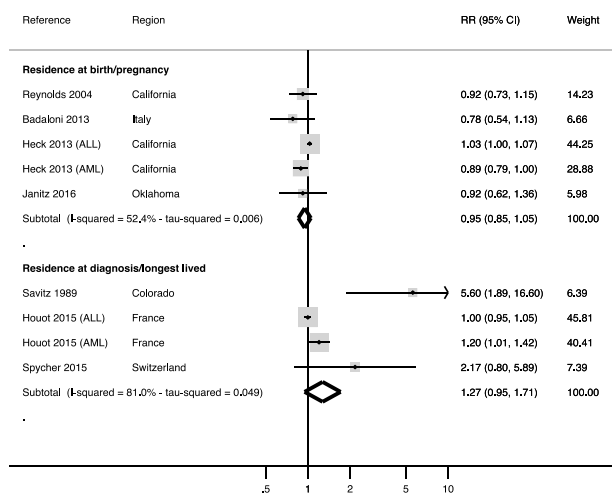

D

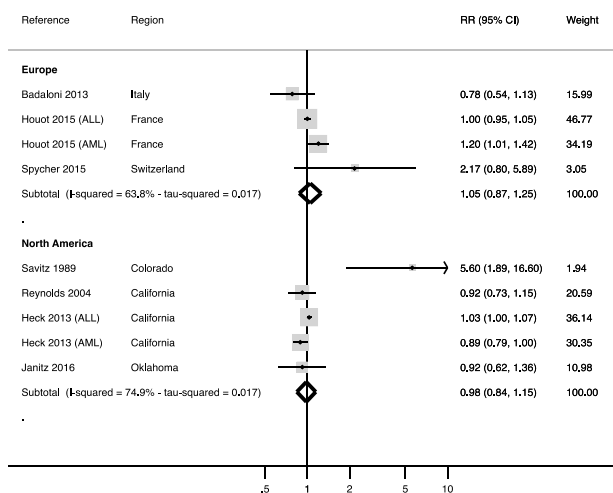

**Figure S7.** Risk ratio (RR) of childhood leukemia from indicators of traffic exposure restricted to pre-school children: all studies (A); by leukemia subtype (B); by exposure window, i.e. residence at birth vs. at diagnosis (C); by region/continent (D). The area of each gray square is proportional to the inverse of the variance of the estimated log RR. Black diamonds represent point estimates of RR and horizontal lines represent their 95% confidence intervals (CIs). The open diamonds represent the combined RR for each subgroup and the overall RR for all studies. The solid line represents RR=1. The dash line represents the point estimate of overall RR for all studies.

A

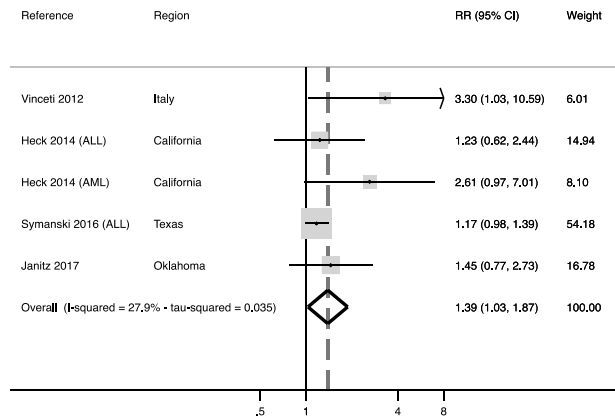

B

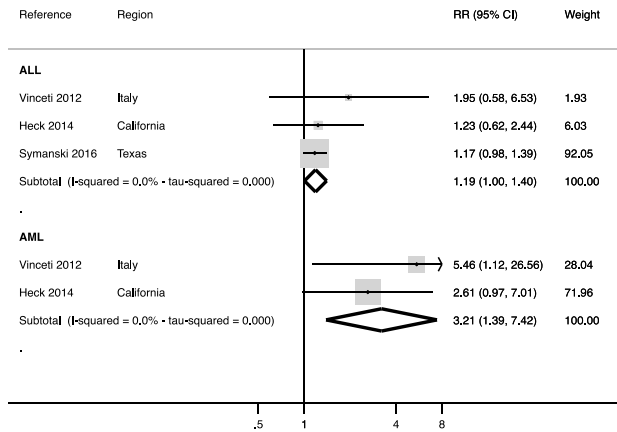

C

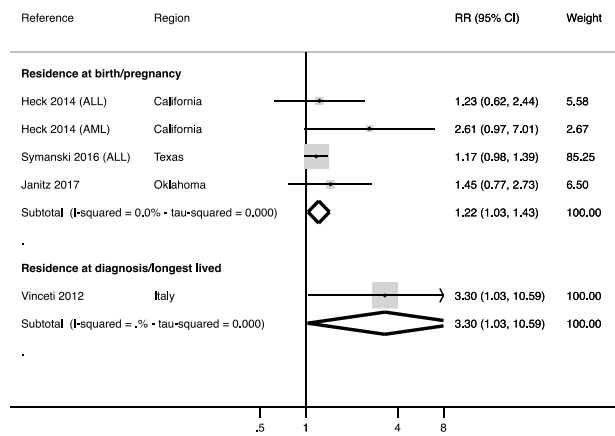

D

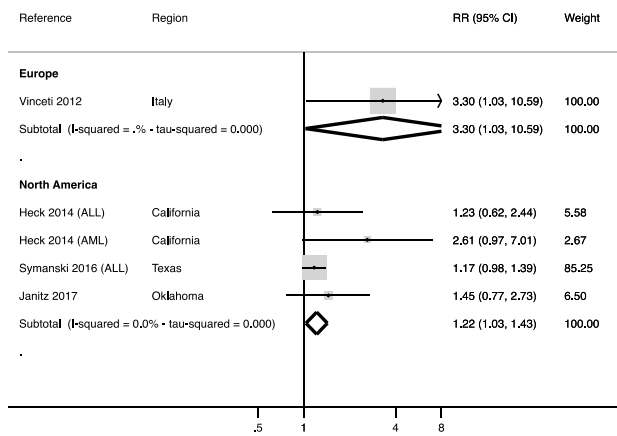

**Figure S8.** Risk ratio (RR) of childhood leukemia and leukemia subtype from benzene exposure restricted to pre-school children: all studies (A); by leukemia subtype (B); by exposure window, i.e. residence at birth vs. at diagnosis (C); by region/continent (D). The area of each gray square is proportional to the inverse of the variance of the estimated log RR. Black diamonds represent point estimates of RR and horizontal lines represent their 95% confidence intervals (CIs). The open diamonds represent the combined RR for each subgroup and the overall RR for all studies. The solid line represents RR=1. The dash line represents the point estimate of overall RR for all studies.

A

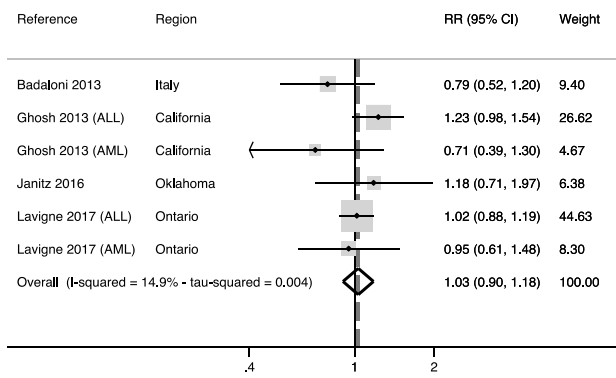

B

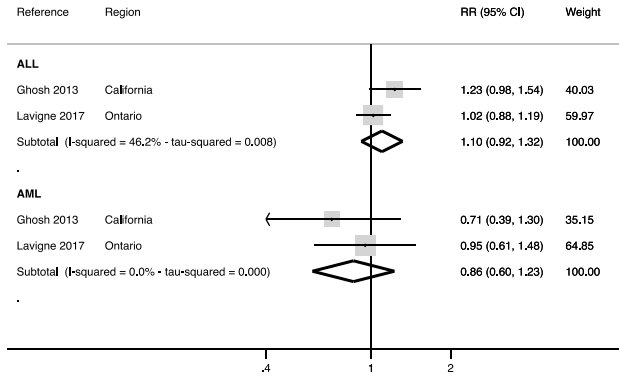

C

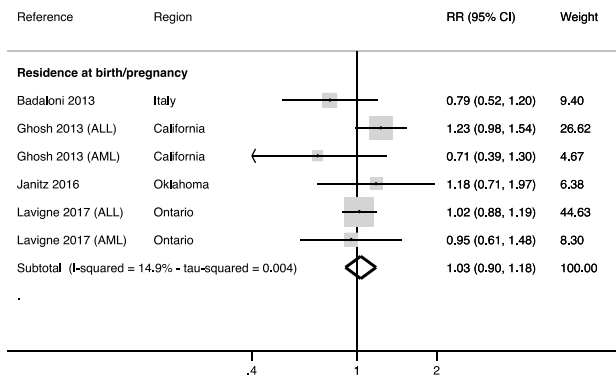

D

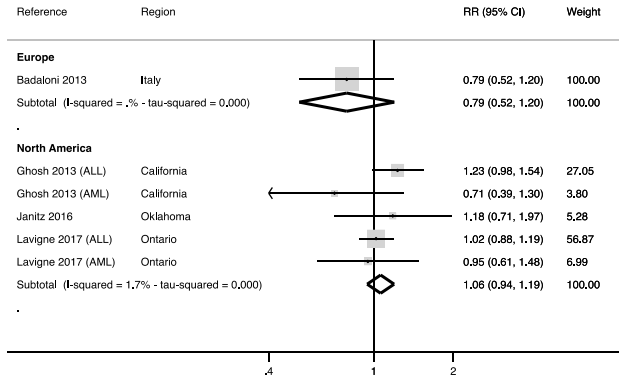

**Figure S9.** Risk ratio (RR) of childhood leukemia and leukemia subtype from air NO<sub>2</sub> exposure restricted to pre-school children: all studies (A); by leukemia subtype (B); by exposure window, i.e. residence at birth vs. at diagnosis (C); by region/continent (D). The area of each gray square is proportional to the inverse of the variance of the estimated log RR. Black diamonds represent point estimates of RR and horizontal lines represent their 95% confidence intervals (CIs). The open diamonds represent the combined RR for each subgroup and the overall RR for all studies. The solid line represents RR=1. The dash line represents the point estimate of overall RR for all studies.



A

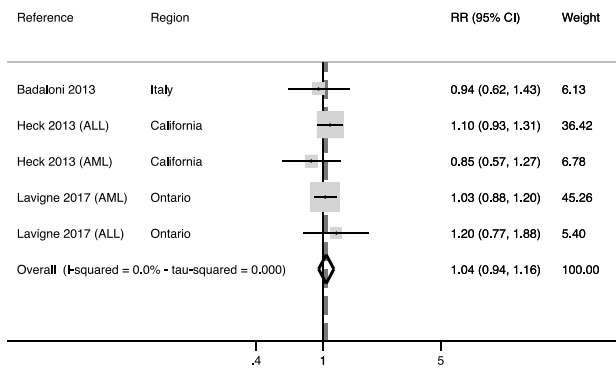

B



C

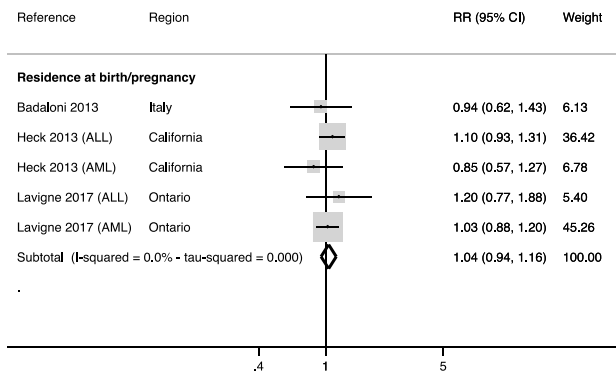

D

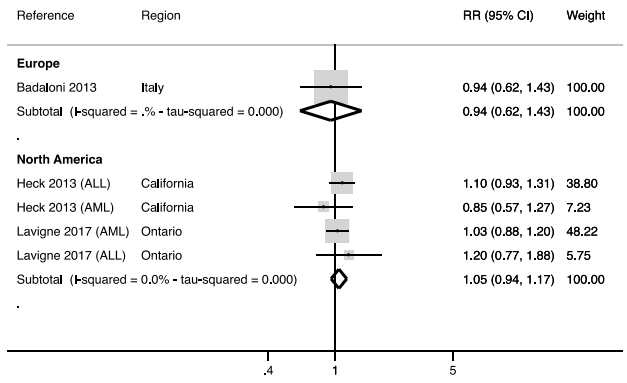

**Figure S10.** Risk ratio (RR) with 95% confidence interval (CI) of childhood leukemia from particulate matter (PM<sub>2.5</sub>) restricted to pre-school children: all studies (A); by leukemia subtype (B); by exposure window, i.e. residence at birth vs. at diagnosis (C); by region/continent (D). The area of each gray square is proportional to the inverse of the variance of the estimated log RR. Black diamonds represent point estimates of RR and horizontal lines represent their 95% confidence intervals (CIs). The open diamonds represent the combined RR for each subgroup and the overall RR for all studies. The solid line represents RR=1. The dash line represents the point estimate of overall RR for all studies.

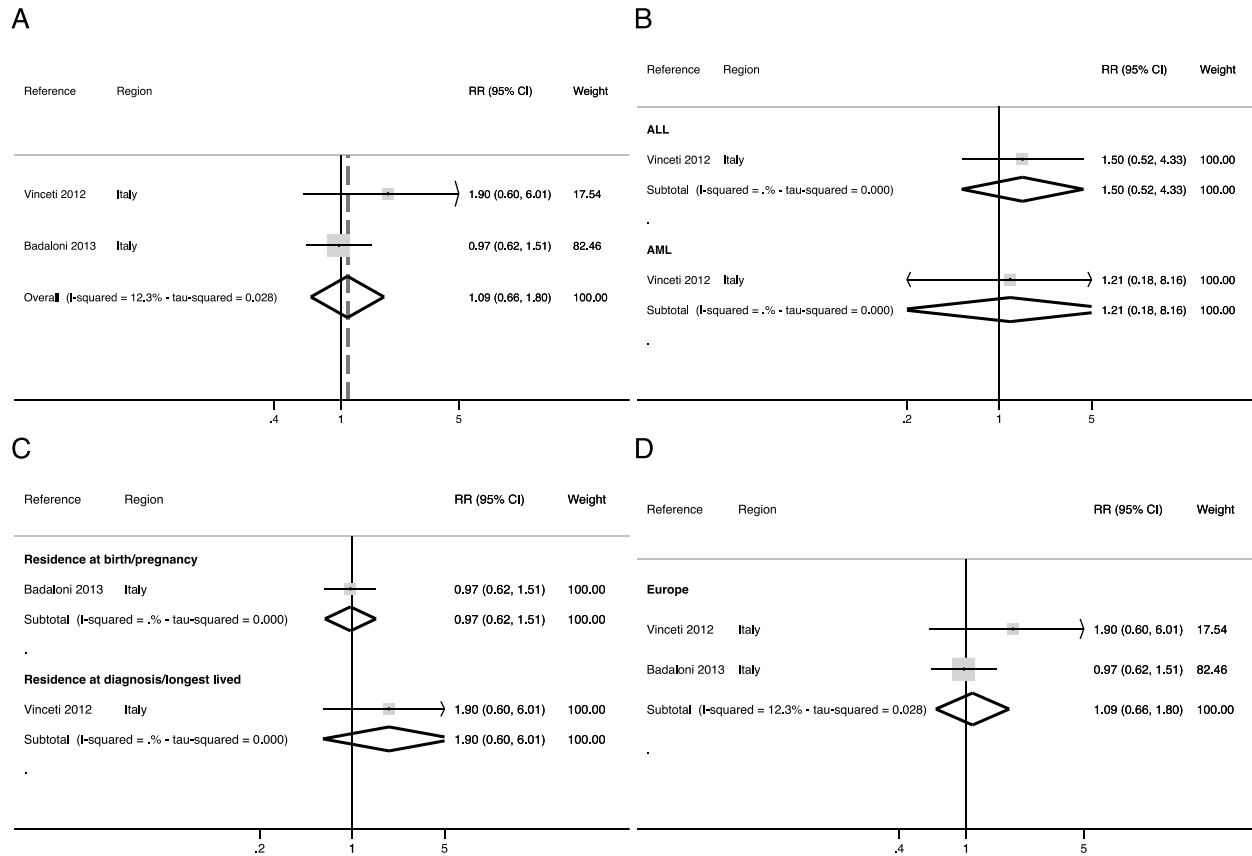

**Figure S11.** Risk ratio (RR) with 95% confidence interval (CI) of childhood leukemia from particulate matter (PM<sub>10</sub>) restricted to pre-school children: all studies (A); by leukemia subtype (B); by exposure window, i.e. residence at birth vs. at diagnosis (C); by region/continent (D). The area of each gray square is proportional to the inverse of the variance of the estimated log RR. Black diamonds represent point estimates of RR and horizontal lines represent their 95% confidence intervals (CIs). The open diamonds represent the combined RR for each subgroup and the overall RR for all studies. The solid line represents RR=1. The dash line represents the point estimate of overall RR for all studies.

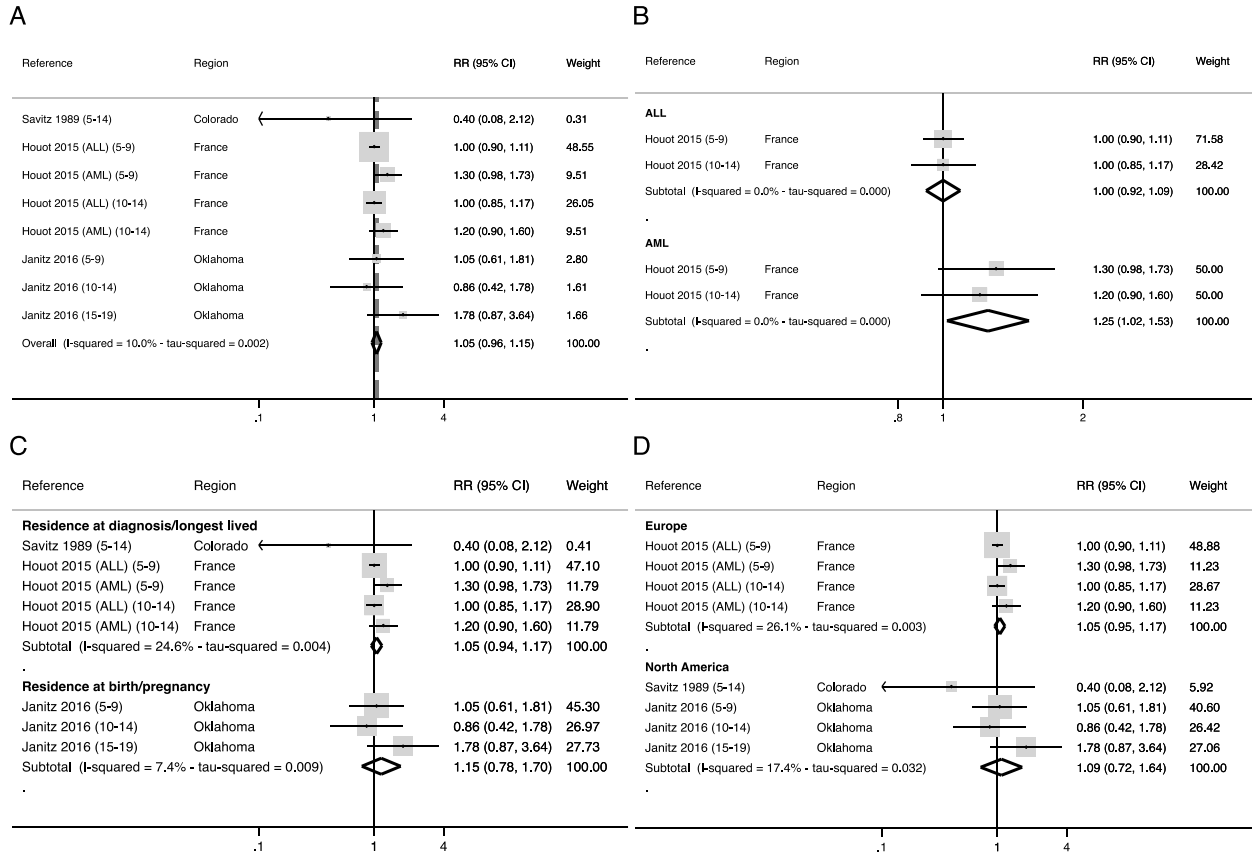

**Figure S12.** Risk ratio (RR) of childhood leukemia from indicators of traffic exposure restricted to older (>6 years) children: all studies (A); by leukemia subtype (B); by exposure window, i.e. residence at birth vs. at diagnosis (C); by region/continent (D). The area of each gray square is proportional to the inverse of the variance of the estimated log RR. Black diamonds represent point estimates of RR and horizontal lines represent their 95% confidence intervals (CIs). The open diamonds represent the combined RR for each subgroup and the overall RR for all studies. The solid line represents RR=1. The dash line represents the point estimate of overall RR for all studies.

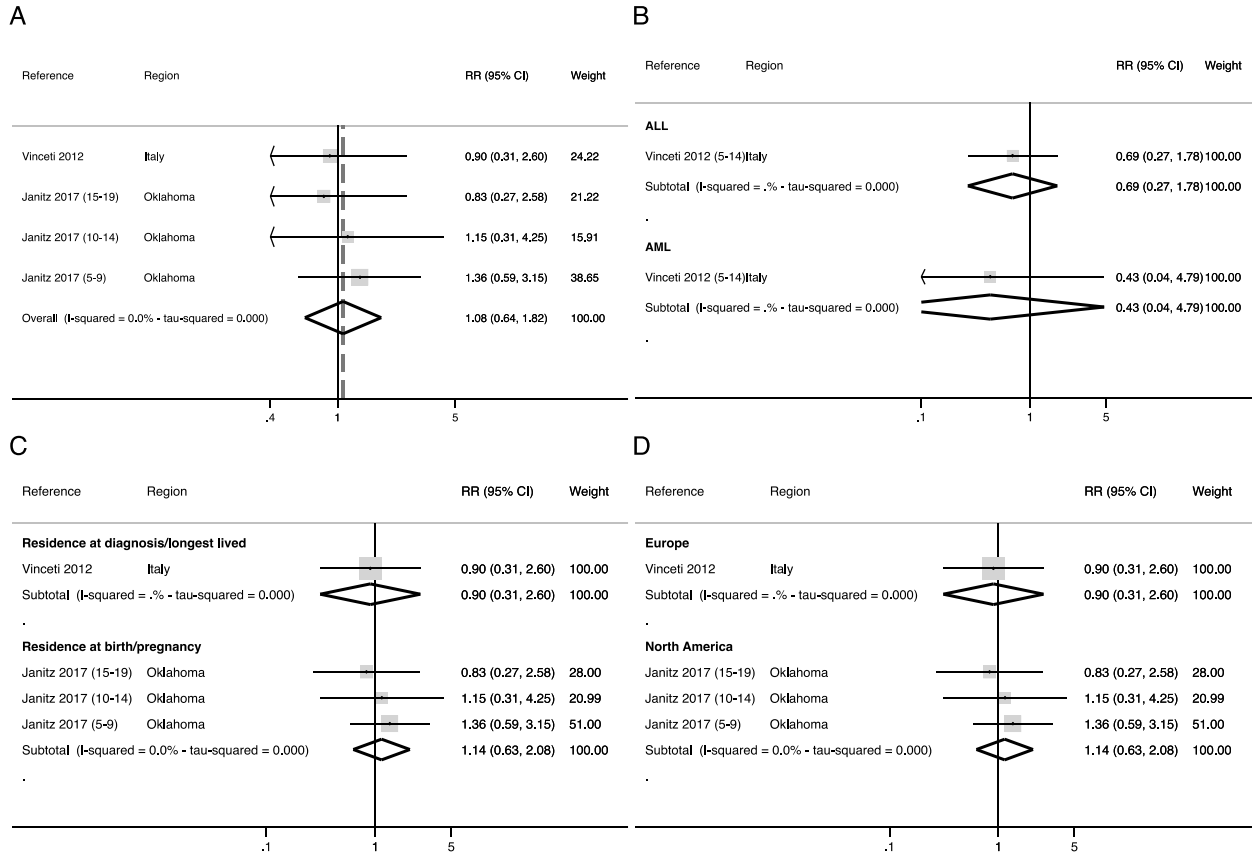

**Figure S13.** Risk ratio (RR) of childhood leukemia and leukemia subtype from benzene exposure restricted to older (>6 years) children: all studies (A); by leukemia subtype (B); by exposure window, i.e. residence at birth vs. at diagnosis (C); by region/continent (D). The area of each gray square is proportional to the inverse of the variance of the estimated log RR. Black diamonds represent point estimates of RR and horizontal lines represent their 95% confidence intervals (CIs). The open diamonds represent the combined RR for each subgroup and the overall RR for all studies. The solid line represents RR=1. The dash line represents the point estimate of overall RR for all studies.

A

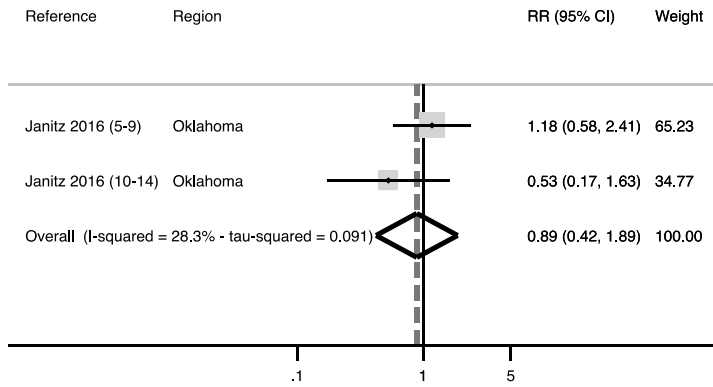

B

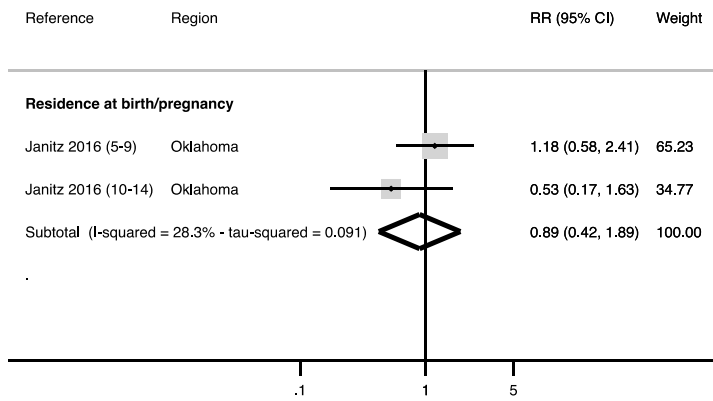

C

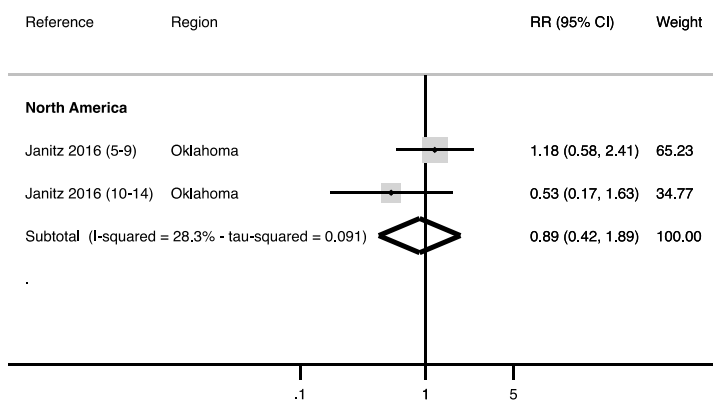

**Figure S14.** Risk ratio (RR) of childhood leukemia from NO<sub>2</sub> exposure restricted to older (>6 years) children: all studies (A); by exposure window, i.e. residence at birth vs. at diagnosis (B); by region/continent (C). The area of each gray square is proportional to the inverse of the variance of the estimated log RR. Black diamonds represent point estimates of RR and horizontal lines represent their 95% confidence intervals (CIs). The open diamonds represent the combined RR for each subgroup and the overall RR for all studies. The solid line represents RR=1. The dash line represents the point estimate of overall RR for all studies.

A

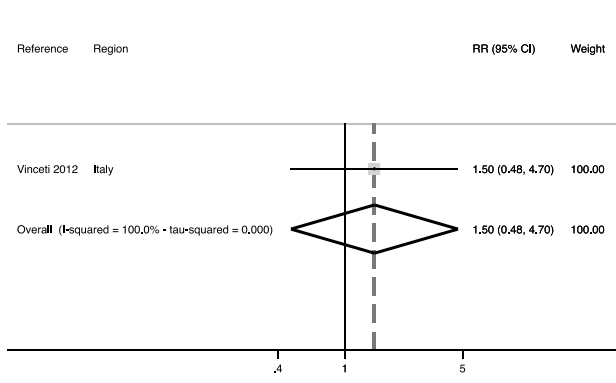

B

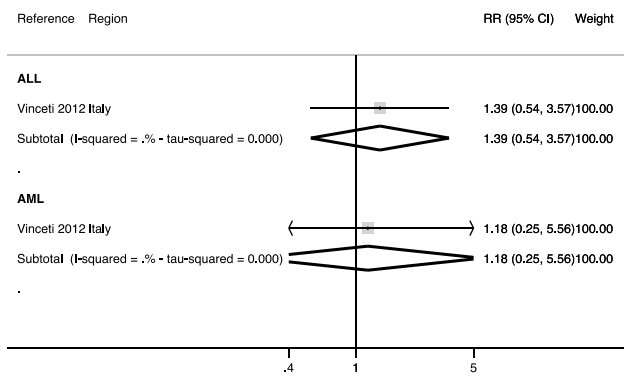

C

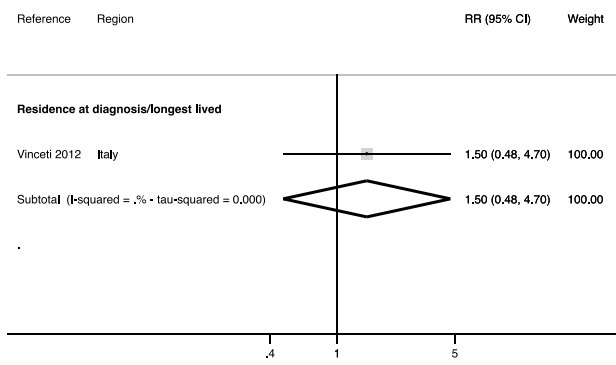

D

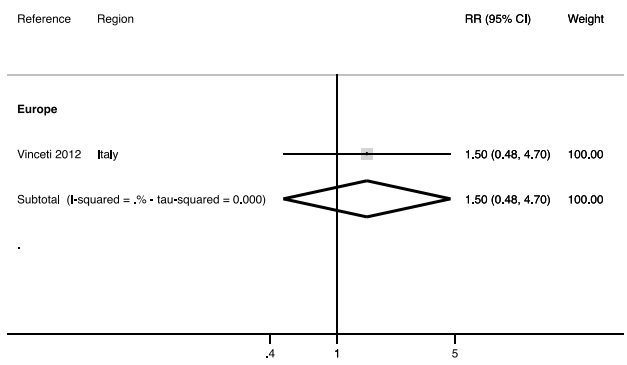

**Figure S15.** Risk ratio (RR) with 95% confidence interval (CI) of childhood leukemia from particulate matter (PM<sub>10</sub>) restricted to pre-school children: all studies (A); by leukemia subtype (B); by exposure window, i.e. residence at birth vs. at diagnosis (C); by region/continent (D). The area of each gray square is proportional to the inverse of the variance of the estimated log RR. Black diamonds represent point estimates of RR and horizontal lines represent their 95% confidence intervals (CIs). The open diamonds represent the combined RR for each subgroup and the overall RR for all studies. The solid line represents RR=1. The dash line represents the point estimate of overall RR for all studies.

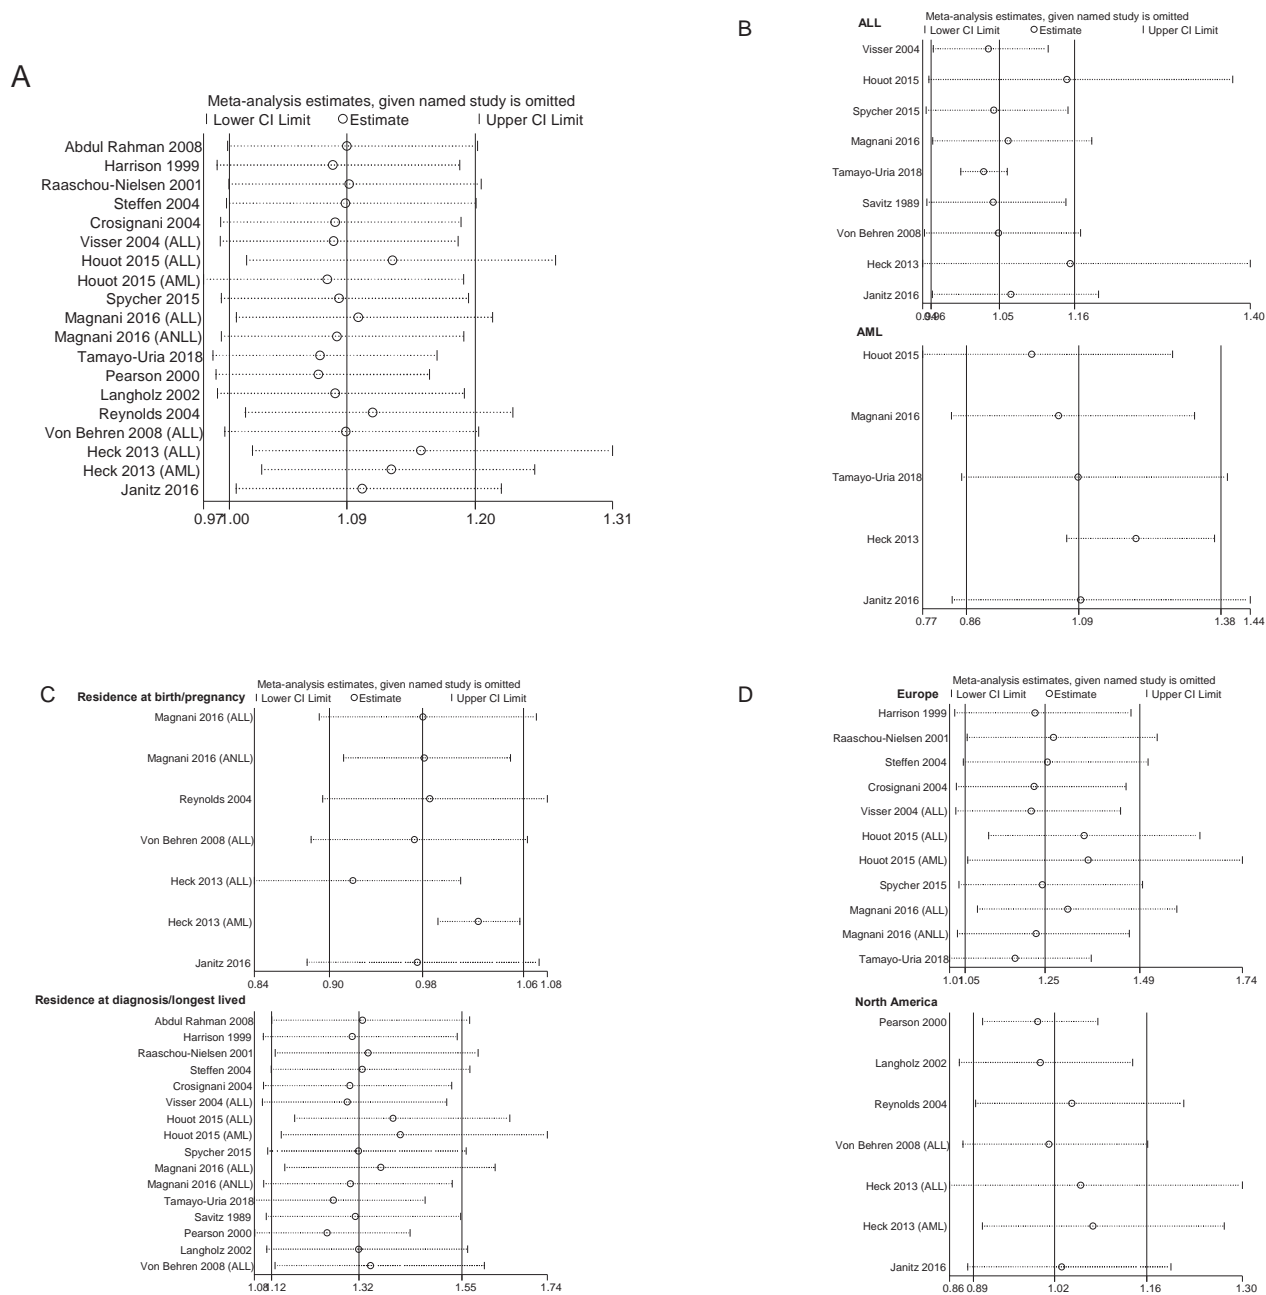

**Figure S16.** Sensitivity analysis with summary estimate with 95% confidence interval (CI) of childhood leukemia from indicators of traffic exposure for all children after removal of single study result (leave-one-out analysis): all studies (A); by leukemia subtype (B); by exposure window, i.e. residence at birth vs. at diagnosis (C); by region/continent (D). Each given named study is omitted when computing the overall meta-analysis summary estimate. Hollow circles represent point estimates of RR and horizontal dotted lines represent their 95% confidence intervals (CIs). The solid lines represent the point estimate of overall RR for all studies with its 95% CI.

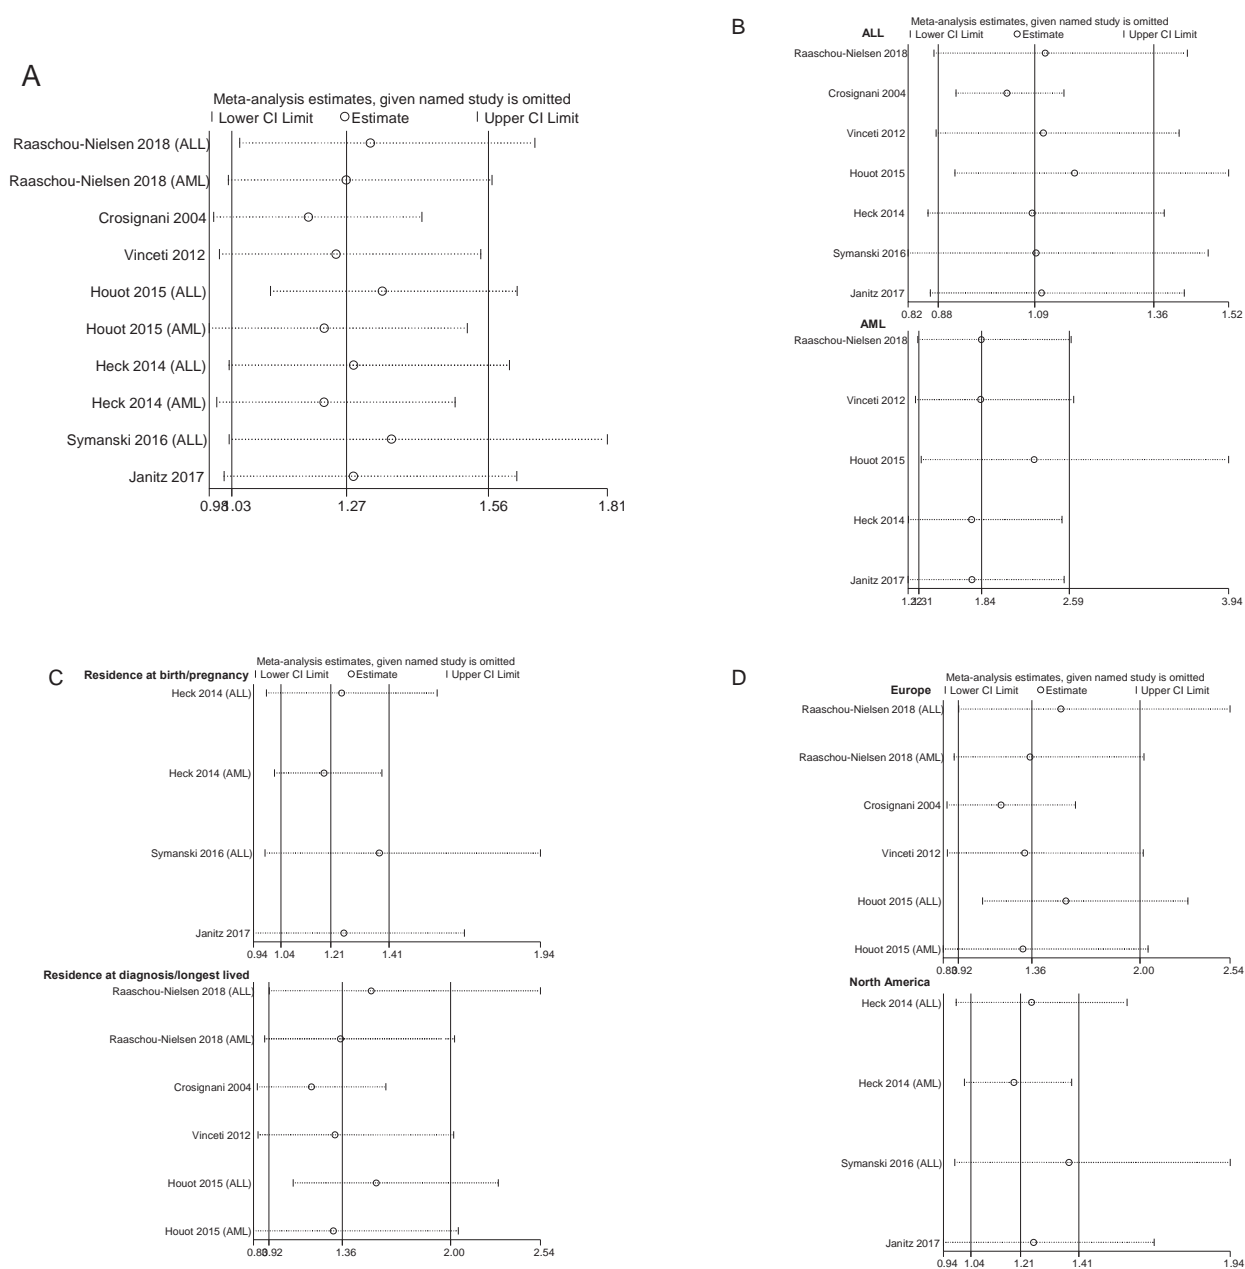

**Figure S17.** Sensitivity analysis with summary estimate with 95% confidence interval (CI) of childhood leukemia from benzene exposure for all children after removal of single study result (leave-one-out analysis): all studies (A); by leukemia subtype (B); by exposure window, i.e. residence at birth vs. at diagnosis (C); by region/continent (D). Each given named study is omitted when computing the overall meta-analysis summary estimate. Hollow circles represent point estimates of RR and horizontal dotted lines represent their 95% confidence intervals (CIs). The solid lines represent the point estimate of overall RR for all studies with its 95% CI.



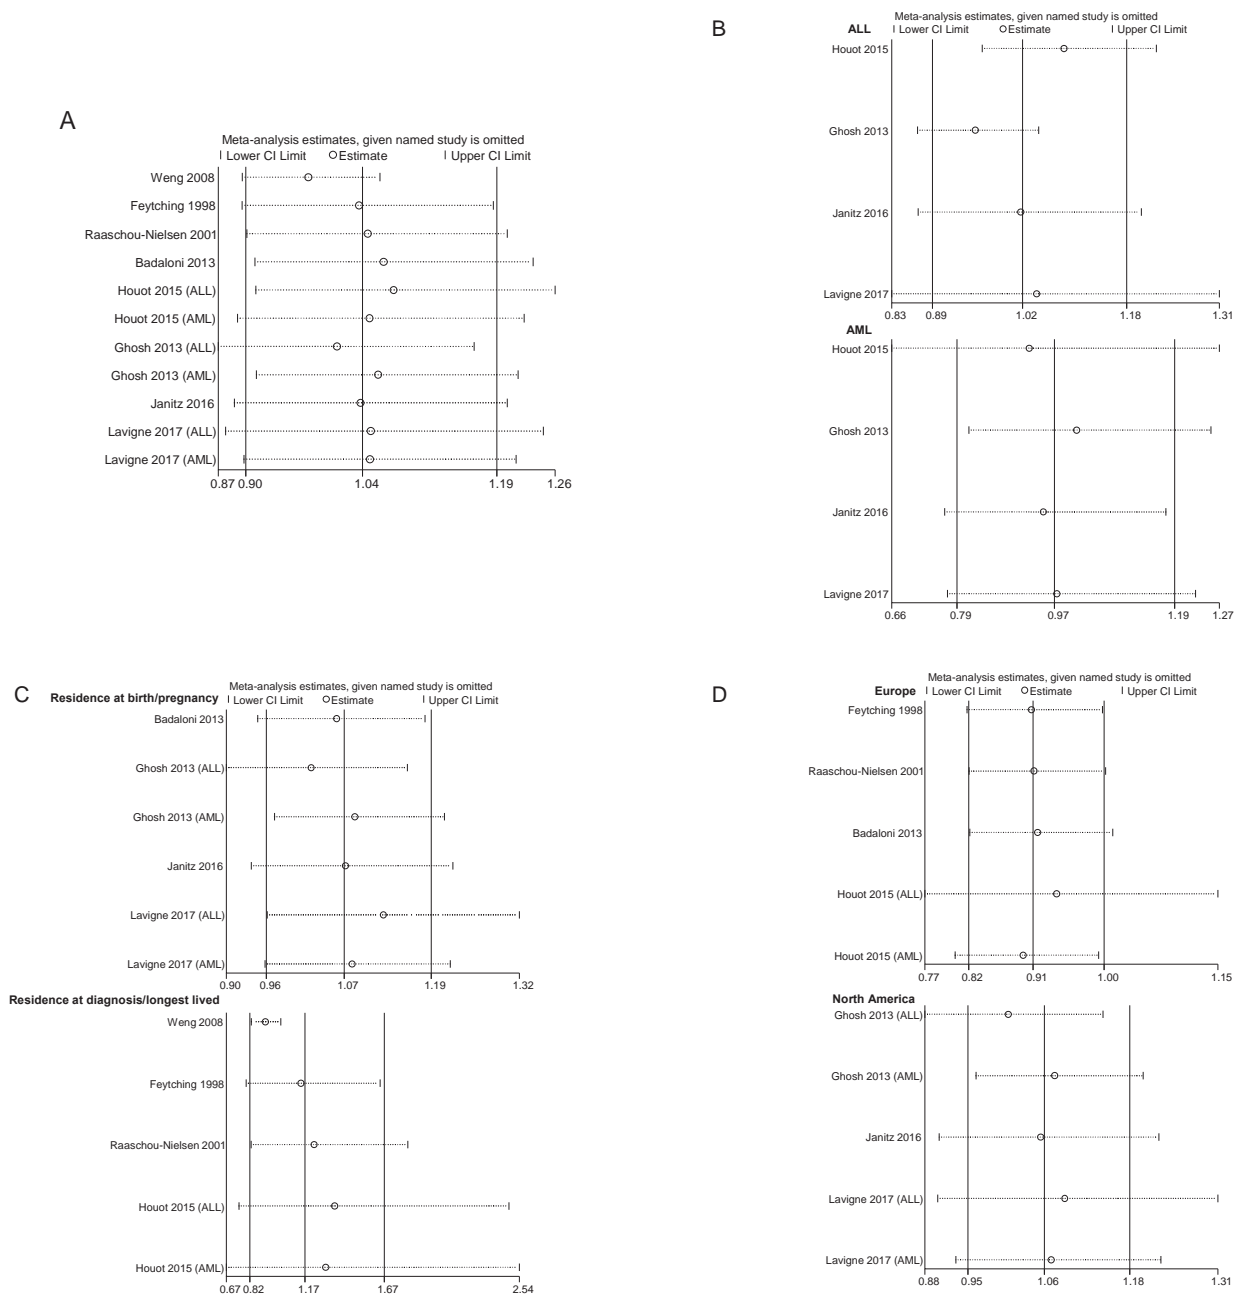

**Figure S18.** Sensitivity analysis with summary estimate with 95% confidence interval (CI) of childhood leukemia from nitrogen dioxide exposure for all children after removal of single study result (leave-one-out analysis): all studies (A); by leukemia subtype (B); by exposure window, i.e. residence at birth vs. at diagnosis (C); by region/continent (D). Each given named study is omitted when computing the overall meta-analysis summary estimate. Hollow circles represent point estimates of RR and horizontal dotted lines represent their 95% confidence intervals (CIs). The solid lines represent the point estimate of overall RR for all studies with its 95% CI.

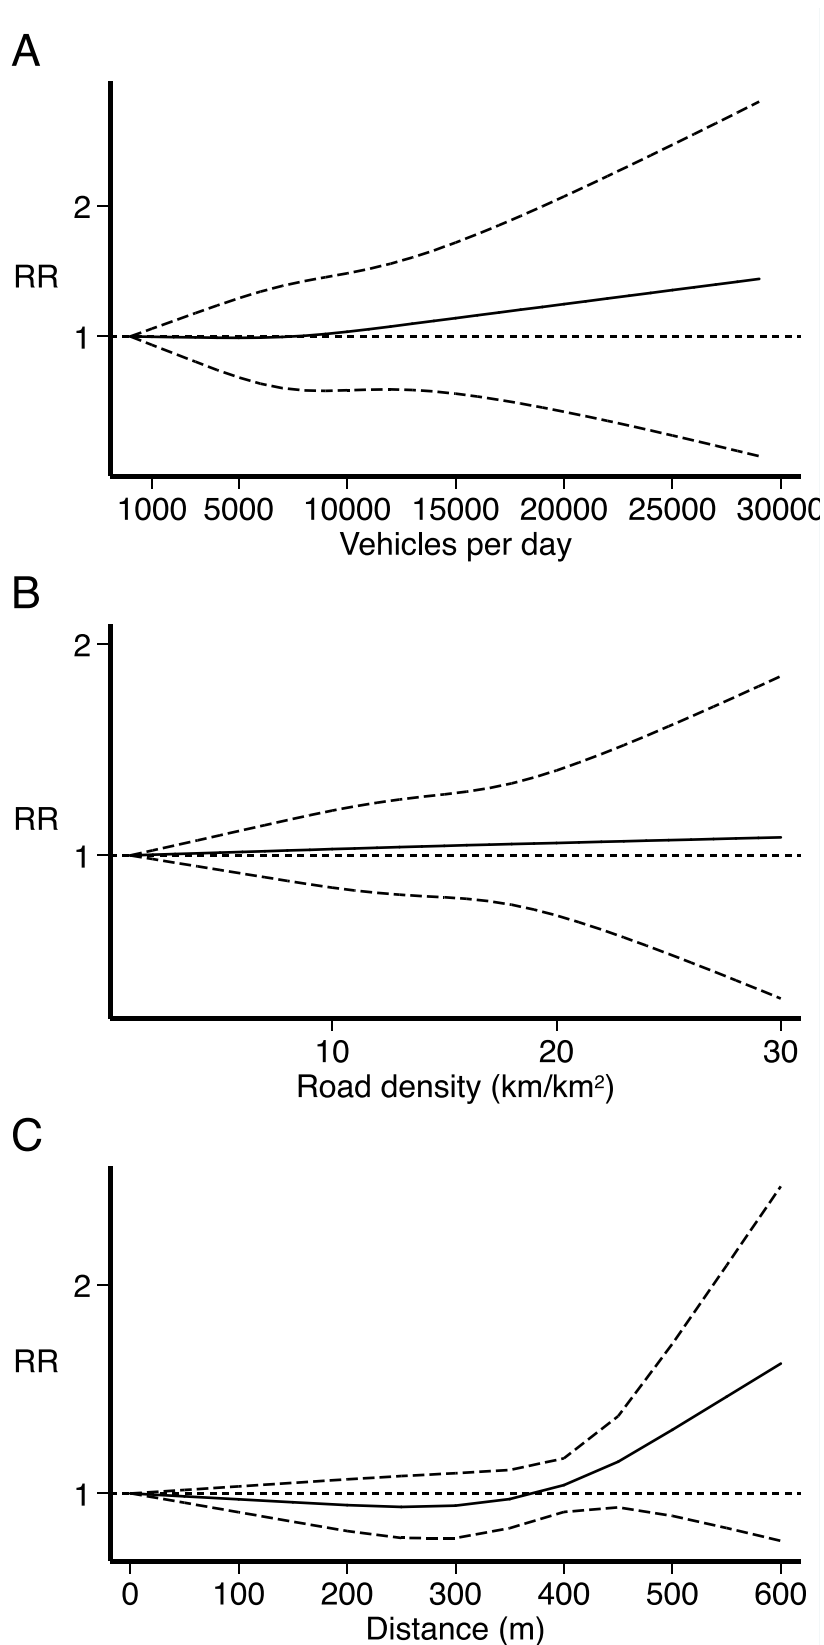

**Figure S19.** Sensitivity analysis entering a  $\pm 15\%$  value instead of  $\pm 20$  in the dose-response meta-analysis of childhood leukemia risk from traffic indicators using vehicles per day count (A), road density in km/km<sup>2</sup> (B), and distance from a major road in meters (C). Overall spline curve (black solid line) with 95% confidence limits (black dashed lines). RR: risk ratio.

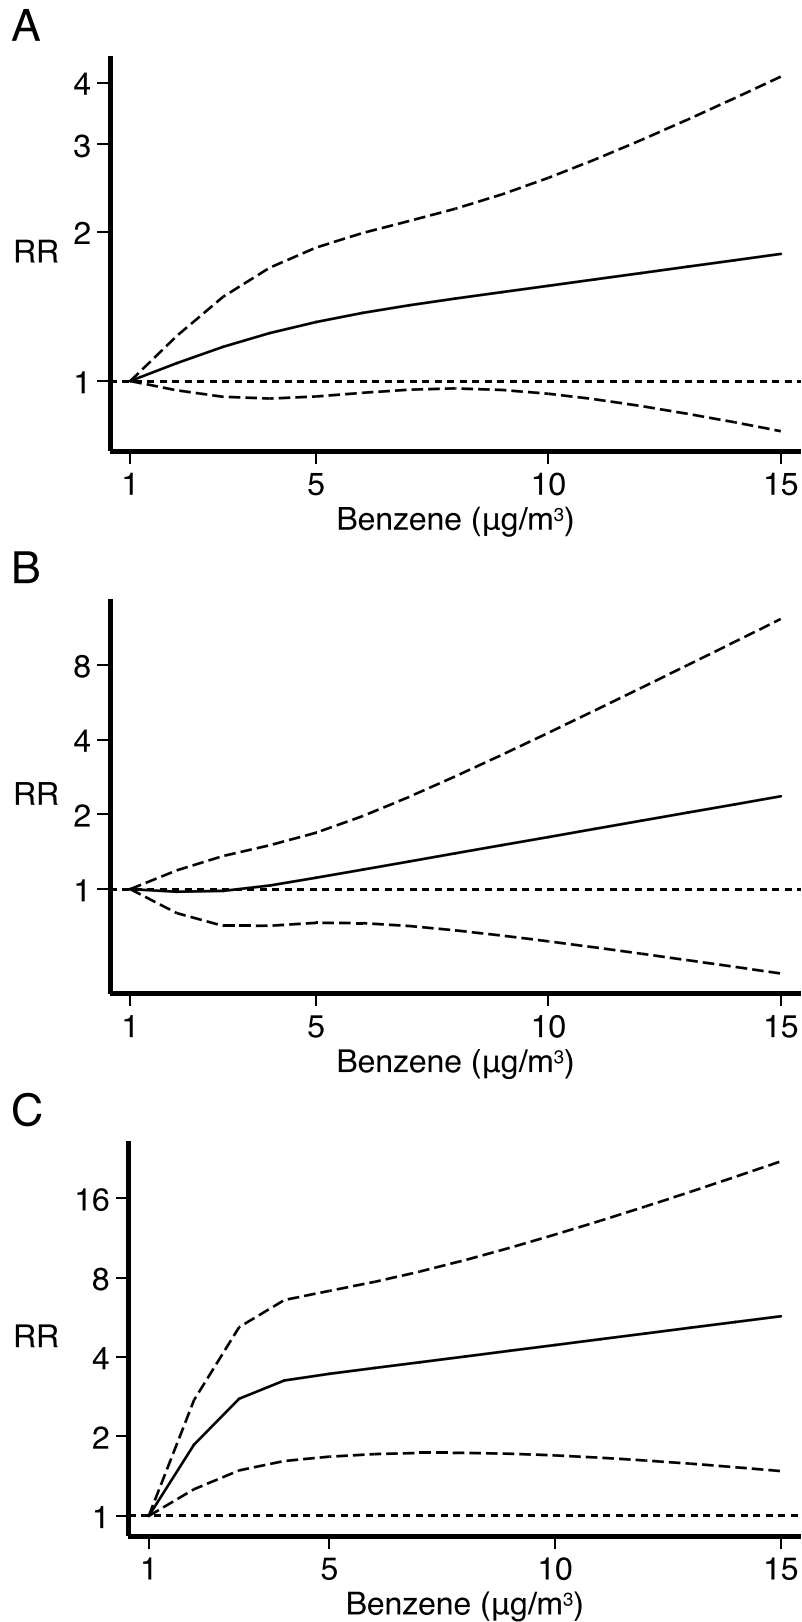

**Figure S20.** Sensitivity analysis entering a  $\pm 15\%$  value instead of  $\pm 20$  in the dose-response meta-analysis of childhood leukemia risk from benzene exposure of all leukemia (A), acute lymphoblastic leukemia only (B), and acute myeloid leukemia only (C). Overall spline curve (black solid line) with 95% confidence limits (black dashed lines). RR: risk ratio.

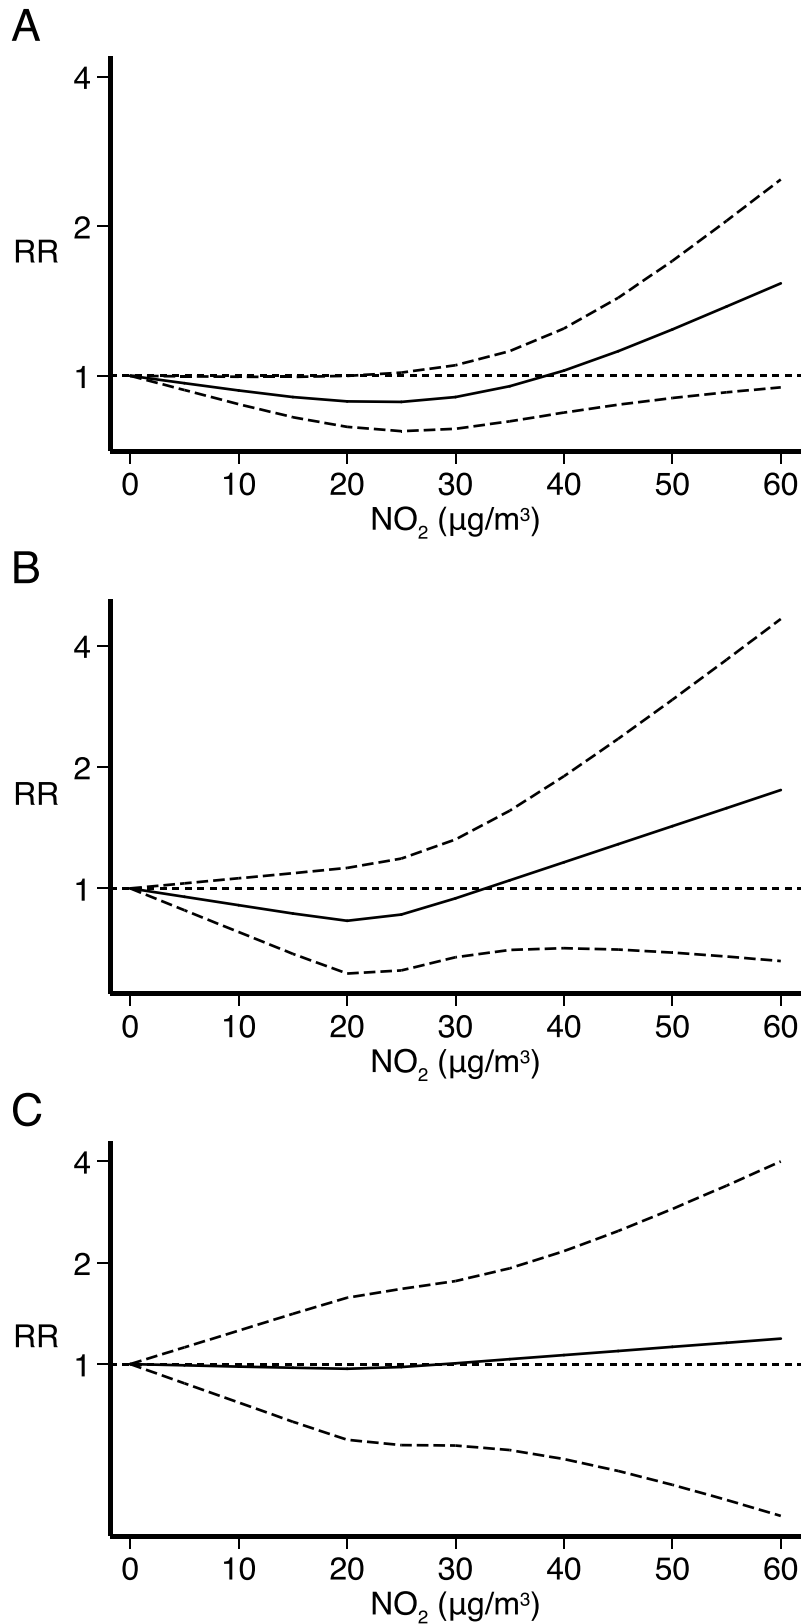

**Figure S21.** Sensitivity analysis entering a  $\pm 15\%$  value instead of  $\pm 20$  in the dose-response meta-analysis of childhood leukemia risk from nitrogen dioxide exposure of all leukemia (A), acute lymphoblastic leukemia only (B), and acute myeloid leukemia only (C). Overall spline curve (black solid line) with 95% confidence limits (black dashed lines). RR: risk ratio.

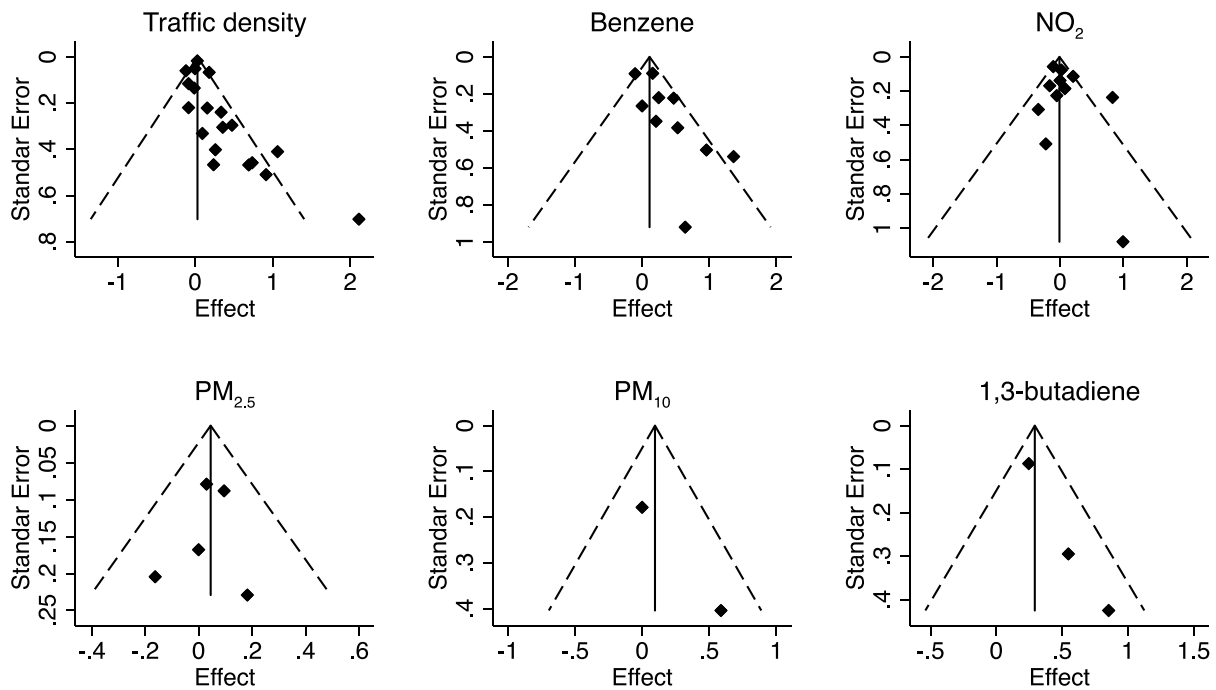

**Figure S22.** Funnel plots for publication bias for traffic density, benzene, nitrogen dioxide (NO<sub>2</sub>), particulate matter (PM<sub>2.5</sub>/PM<sub>10</sub>), and 1,3-butadiene indicators. Black diamonds represent studies included in each analysis, the x-axis indicates the study effect/results through its risk ratio (RR), and the y-axis indicates study precision through its standard error. The outer dashed lines indicate the triangular region within which 95% of studies are expected to lie in the absence of both biases and heterogeneity. The solid vertical line corresponds to overall summary RR from meta-analysis of included studies.

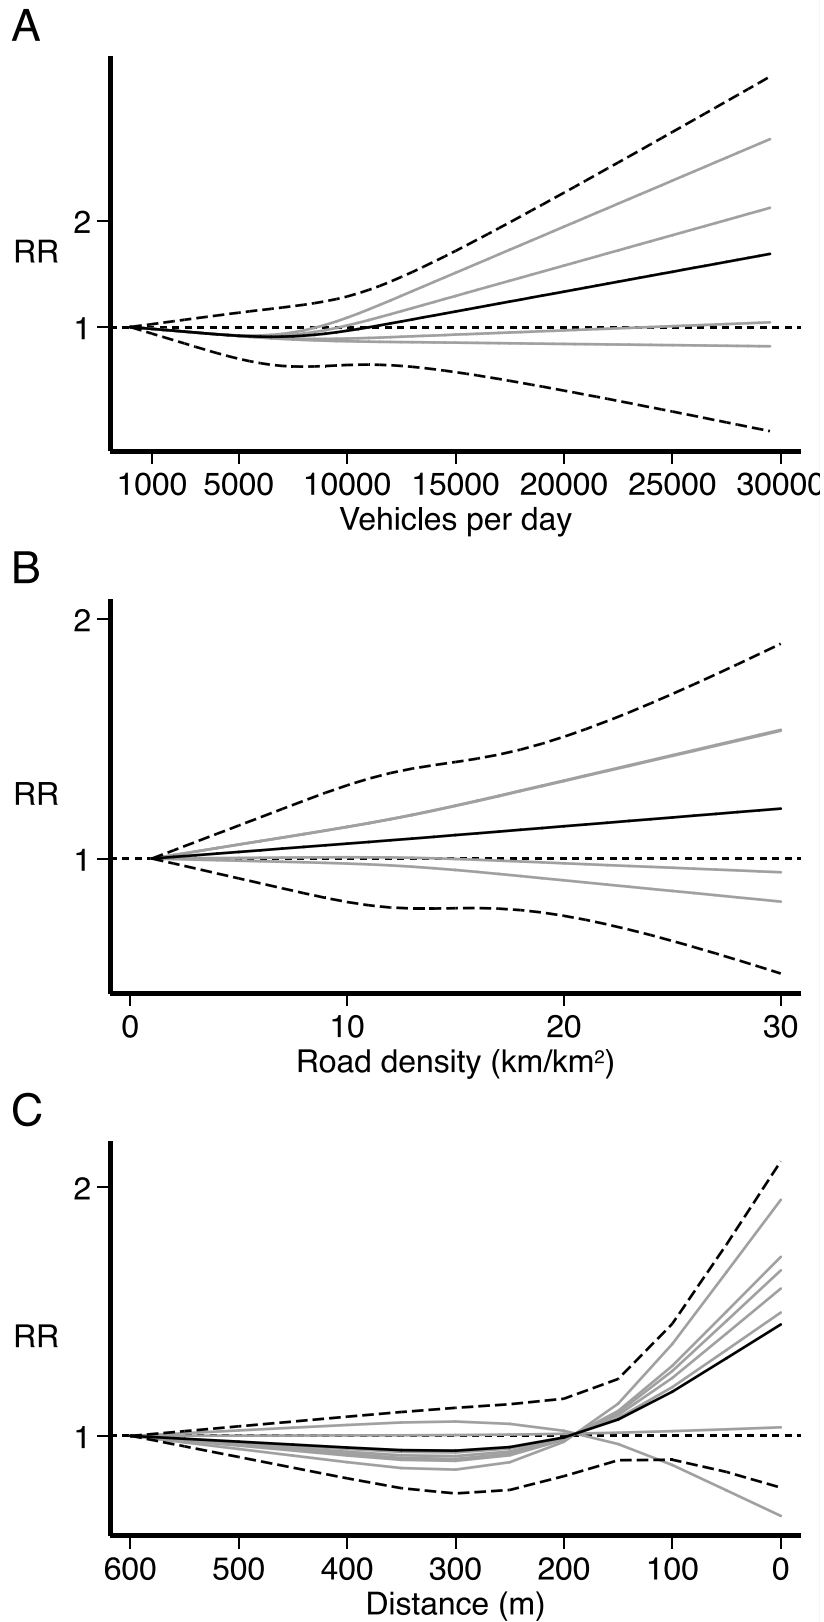

**Figure S23.** Dose-response meta-analysis of childhood leukemia risk from traffic indicators using vehicles per day count (A), road density in km/km<sup>2</sup> (B), and distance from a major road in meters (C). Overall spline curve (black solid line) with 95% confidence limits (black dashed lines) and the study-specific trends showing the influence of variation across studies (gray solid lines). RR: risk ratio.

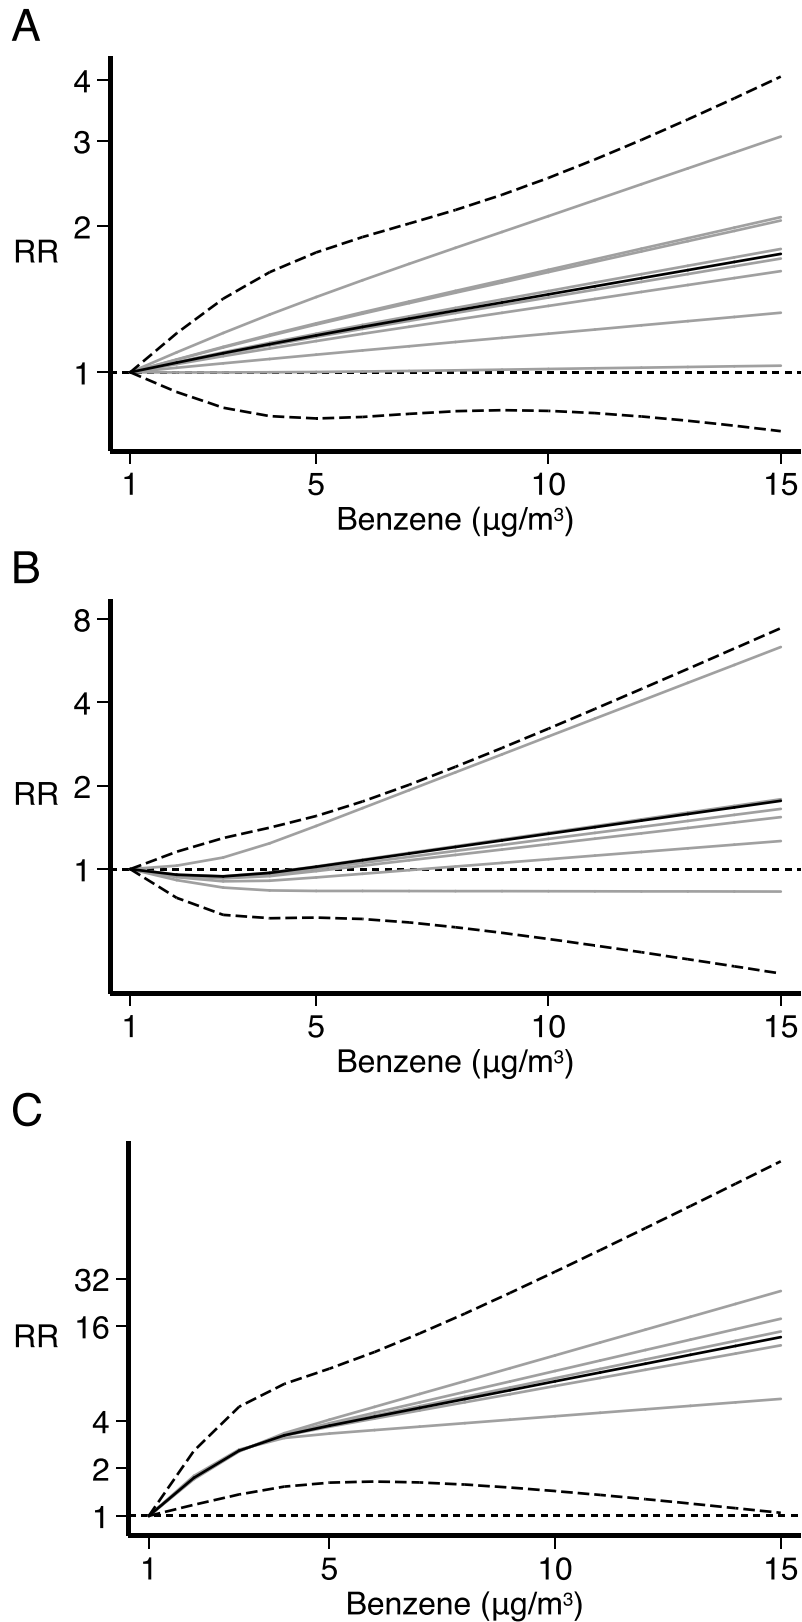

**Figure S24.** Dose-response meta-analysis of childhood leukemia risk from benzene exposure of all leukemia (A), acute lymphoblastic leukemia only (B), and acute myeloid leukemia only (C). Overall spline curve (black solid line) with 95% confidence limits (black dashed lines) and the study-specific trends showing the influence of variation across studies (grey solid lines). RR: risk ratio.

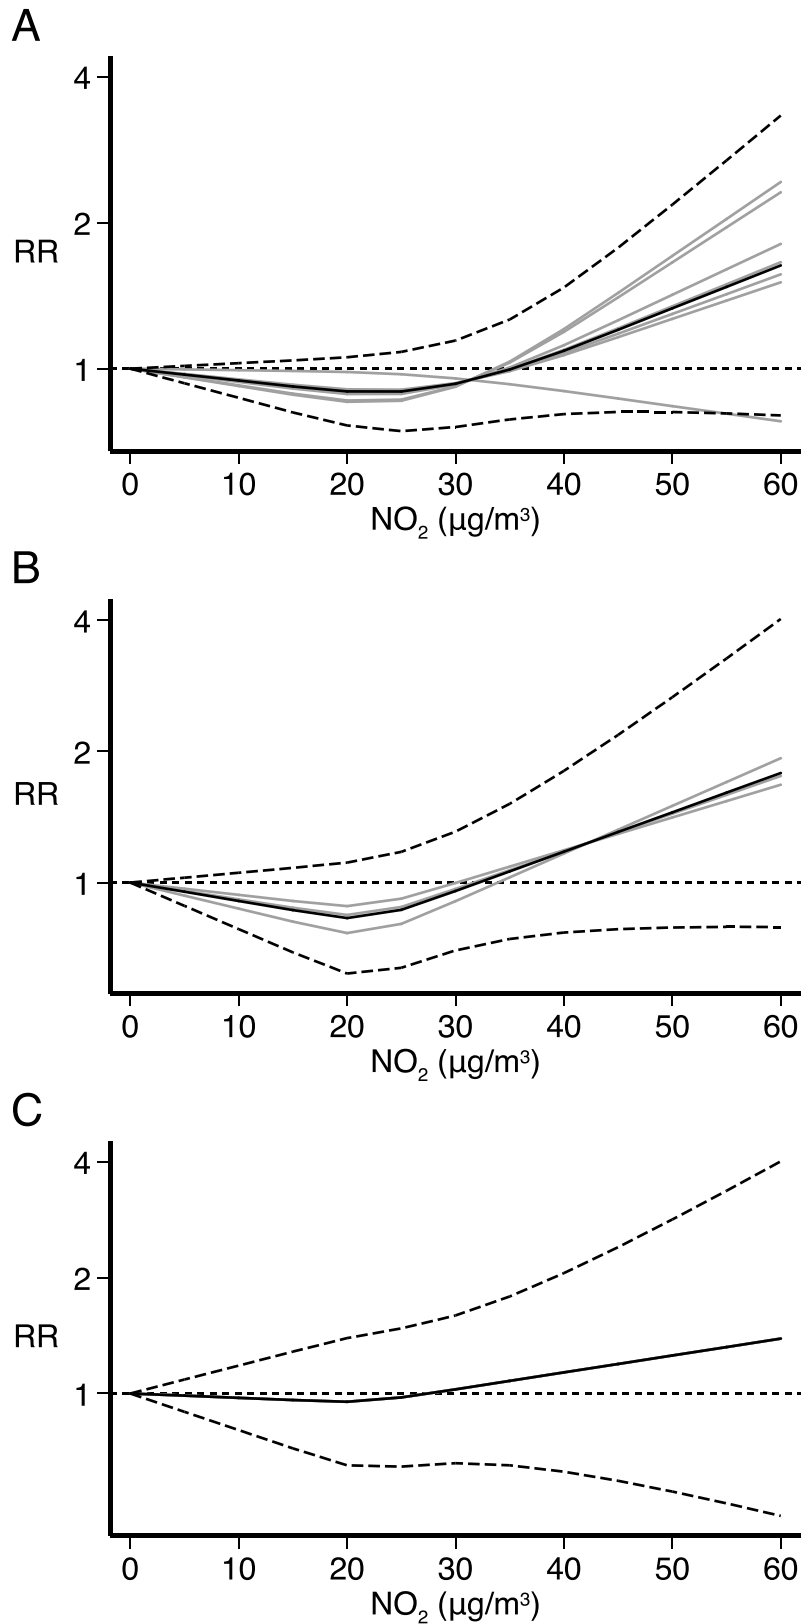

**Figure S25.** Dose-response meta-analysis of childhood leukemia risk from NO<sub>2</sub> exposure of all leukemia (A), acute lymphoblastic leukemia only (B), and acute myeloid leukemia only (C). Overall spline curve (black solid line) with 95% confidence limits (black dashed lines) and the study-specific trends showing the influence of variation across studies (grey solid lines). RR: risk ratio.



## References for Supplemental Material:

Abdul Rahman HI, Shah SA, Alias H, Ibrahim HM. 2008. A case-control study on the association between environmental factors and the occurrence of acute leukemia among children in Klang Valley, Malaysia. *Asian Pac J Cancer Prev* 9(4):649-652, PMID: 19256754.

Amigou A, Sermage-Faure C, Orsi L, Leverger G, Baruchel A, Bertrand Y, et al. 2011. Road traffic and childhood leukemia: the ESCALE study (SFCE). *Environ Health Perspect* 119(4):566-572, PMID: 21147599, <https://doi.org/10.1289/ehp.1002429>.

Badaloni C, Ranucci A, Cesaroni G, Zanini G, Vienneau D, Al-Aidrous F, et al. 2013. Air pollution and childhood leukaemia: a nationwide case-control study in Italy. *Occup Environ Med* 70(12):876-883, PMID: 24142970, <https://doi.org/10.1136/oemed-2013-101604>.

Crosignani P, Tittarelli A, Borgini A, Codazzi T, Rovelli A, Porro E, et al. 2004. Childhood leukemia and road traffic: A population-based case-control study. *Int J Cancer* 108(4):596-599, PMID: 14696126, <https://doi.org/10.1002/ijc.11597>.

Feychting M, Svensson D, Ahlbom A. 1998. Exposure to motor vehicle exhaust and childhood cancer. *Scand J Work Environ Health* 24(1):8-11, PMID: 9562395, <https://doi.org/10.5271/sjweh.272>.

Ghosh JK, Heck JE, Cockburn M, Su J, Jerrett M, Ritz B. 2013. Prenatal exposure to traffic-related air pollution and risk of early childhood cancers. *Am J Epidemiol* 178(8):1233-1239, PMID: 23989198, <https://doi.org/10.1093/aje/kwt129>.

Harrison RM, Leung PL, Somerville L, Smith R, Gilman E. 1999. Analysis of incidence of childhood cancer in the West Midlands of the United Kingdom in relation to proximity to main roads and petrol stations. *Occup Environ Med* 56(11):774-780, PMID: 10658564.

Heck JE, Wu J, Lombardi C, Qiu J, Meyers TJ, Wilhelm M, et al. 2013. Childhood cancer and traffic-related air pollution exposure in pregnancy and early life. *Environ Health Perspect* 121(11-12):1385-1391, PMID: 24021746, <https://doi.org/10.1289/ehp.1306761>.

Heck JE, Park AS, Qiu J, Cockburn M, Ritz B. 2014. Risk of leukemia in relation to exposure to ambient air toxics in pregnancy and early childhood. *Int J Hyg Environ Health* 217(6):662-668, PMID: 24472648, <https://doi.org/10.1016/j.ijheh.2013.12.003>.

Houot J, Marquant F, Goujon S, Faure L, Honore C, Roth MH, et al. 2015. Residential proximity to heavy-traffic roads, benzene exposure, and childhood leukemia-The GEOCAP Study, 2002-2007. *Am J Epidemiol* 182(8):685-693, PMID: 26377958, <https://doi.org/10.1093/aje/kwv111>.

Janitz AE, Campbell JE, Magzamen S, Pate A, Stoner JA, Peck JD. 2016. Traffic-related air pollution and childhood acute leukemia in Oklahoma. *Environ Res* 148:102-111, PMID: 27038831, <https://doi.org/10.1016/j.envres.2016.03.036>.

Janitz AE, Campbell JE, Magzamen S, Pate A, Stoner JA, Peck JD. 2017. Benzene and childhood acute leukemia in Oklahoma. *Environ Res* 158:167-173, PMID: 28645022, <https://doi.org/10.1016/j.envres.2017.06.015>.

Langholz B, Ebi KL, Thomas DC, Peters JM, London SJ. 2002. Traffic density and the risk of childhood leukemia in a Los Angeles case-control study. *Ann Epidemiol* 12(7):482-487, PMID: 12377426, [https://doi.org/10.1016/S1047-2797\(01\)00317-9](https://doi.org/10.1016/S1047-2797(01)00317-9).

Lavigne E, Belair MA, Do MT, Stieb DM, Hystad P, van Donkelaar A, et al. 2017. Maternal exposure to ambient air pollution and risk of early childhood cancers: A population-based study in Ontario, Canada. *Environ Int* 100:139-147, PMID: 28108116, <https://doi.org/10.1016/j.envint.2017.01.004>.

Magnani C, Ranucci A, Badaloni C, Cesaroni G, Ferrante D, Miligi L, et al. 2016. Road traffic pollution and childhood leukemia: a nationwide case-control study in Italy. *Arch Med Res* 47(8):694-705, PMID: 28476197, <https://doi.org/10.1016/j.arcmed.2017.02.001>.

- Pearson RL, Wachtel H, Ebi KL. 2000. Distance-weighted traffic density in proximity to a home is a risk factor for leukemia and other childhood cancers. *J Air Waste Manag Assoc* 50(2):175-180, PMID: 10680346, <https://doi.org/10.1080/10473289.2000.10463998>.
- Raaschou-Nielsen O, Hertel O, Thomsen BL, Olsen JH. 2001. Air pollution from traffic at the residence of children with cancer. *Am J Epidemiol* 153(5):433-443, PMID: 11226975, <https://doi.org/10.1093/aje/153.5.433>.
- Raaschou-Nielsen O, Hvidtfeldt UA, Roswall N, Hertel O, Poulsen AH, Sorensen M. 2018. Ambient benzene at the residence and risk for subtypes of childhood leukemia, lymphoma and CNS tumor. *Int J Cancer* 143(6):1367-1373, PMID: 29633247, <https://doi.org/10.1002/ijc.31421>.
- Reynolds P, Elkin E, Scalf R, Von Behren J, Neutra RR. 2001. A case-control pilot study of traffic exposures and early childhood leukemia using a geographic information system. *Bioelectromagnetics Suppl* 5:S58-68, PMID: 11170118.
- Reynolds P, Von Behren J, Gunier RB, Goldberg DE, Hertz A. 2004. Residential exposure to traffic in California and childhood cancer. *Epidemiology* 15(1):6-12, PMID: 14712141, <https://doi.org/10.1097/01.ede.0000101749.28283.de>.
- Savitz DA, Feingold L. 1989. Association of childhood cancer with residential traffic density. *Scand J Work Environ Health* 15(5):360-363, PMID: 2477895, <https://doi.org/10.5271/sjweh.1848>.
- Spycher BD, Feller M, Roosli M, Ammann RA, Diezi M, Egger M, et al. 2015. Childhood cancer and residential exposure to highways: a nationwide cohort study. *Eur J Epidemiol* 30(12):1263-1275, PMID: 26520639, <https://doi.org/10.1007/s10654-015-0091-9>.
- Steffen C, Auclerc MF, Auvrignon A, Baruchel A, Kebaili K, Lambilliotte A, et al. 2004. Acute childhood leukaemia and environmental exposure to potential sources of benzene and other hydrocarbons; a case-control study. *Occup Environ Med* 61(9):773-778, PMID: 15317919, <https://doi.org/10.1136/oem.2003.010868>.
- Symanski E, Tee Lewis PG, Chen TY, Chan W, Lai D, Ma X. 2016. Air toxics and early childhood acute lymphocytic leukemia in Texas, a population based case control study. *Environ Health* 15(1):70, PMID: 27301866, <https://doi.org/10.1186/s12940-016-0154-8>.
- Tamayo-Uria I, Boldo E, Garcia-Perez J, Gomez-Barroso D, Romaguera EP, Cirach M, et al. 2018. Childhood leukaemia risk and residential proximity to busy roads. *Environ Int* 121(Pt 1):332-339, PMID: 30241021, <https://doi.org/10.1016/j.envint.2018.08.056>.
- Vinceti M, Rothman KJ, Crespi CM, Sterni A, Cherubini A, Guerra L, et al. 2012. Leukemia risk in children exposed to benzene and PM10 from vehicular traffic: a case-control study in an Italian population. *Eur J Epidemiol* 27(10):781-790, PMID: 22892901, <https://doi.org/10.1007/s10654-012-9727-1>.
- Visser O, van Wijnen JH, van Leeuwen FE. 2004. Residential traffic density and cancer incidence in Amsterdam, 1989-1997. *Cancer Causes Control* 15(4):331-339, PMID: 15141134, <https://doi.org/10.1023/B:CACO.0000027480.32494.a3>.
- Von Behren J, Reynolds P, Gunier RB, Rull RP, Hertz A, Urayama KY, et al. 2008. Residential traffic density and childhood leukemia risk. *Cancer Epidemiol Biomarkers Prev* 17(9):2298-2301, PMID: 18768496, <https://doi.org/10.1158/1055-9965.EPI-08-0338>.
- Weng HH, Tsai SS, Chen CC, Chiu HF, Wu TN, Yang CY. 2008. Childhood leukemia development and correlation with traffic air pollution in Taiwan using nitrogen dioxide as an air pollutant marker. *J Toxicol Environ Health A* 71(7):434-438, PMID: 18306090, <https://doi.org/10.1080/15287390701839042>.
