# Supplementary material
Source: PubMed Central journal article supplement (PMC6785230)
Supplement: ehp4381.smcontents.508.pdf [file ehp4381.smcontents.508.pdf]

**Note to readers with disabilities:** *EHP* strives to ensure that all journal content is accessible to all readers. However, some figures and Supplemental Material published in *EHP* articles may not conform to [508 standards](#) due to the complexity of the information being presented. If you need assistance accessing journal content, please contact [ehp508@niehs.nih.gov](mailto:ehp508@niehs.nih.gov). Our staff will work with you to assess and meet your accessibility needs within 3 working days.

### **Supplemental Material**

#### **Association between Outdoor Air Pollution and Childhood Leukemia: A Systematic Review and Dose–Response Meta-Analysis**

Tommaso Filippini, Elizabeth E. Hatch, Kenneth J. Rothman, Julia E. Heck, Andrew S. Park, Alessio Crippa, Nicola Orsini, and Marco Vinceti

#### **Table of Contents**

**Table S1.** Detailed PECOS statement used for identification of search strategies implemented on online databases.

**Table S2.** Newcastle - Ottawa quality assessment scale for included studies: details used for study score assignment. High quality choices are identified with a ‘star’ (i.e. asterisk). A maximum of one ‘star’ for each item within the ‘Selection’ and ‘Exposure/Outcome’ categories; maximum of two ‘stars’ for ‘Comparability’ can be identified.

**Table S3.** Newcastle - Ottawa quality assessment scale (NOS) for included studies: details of score assignment for each included study, divided according to case-control and cohort study design. S-1 through S-4 correspond to the ‘Selection’ questions, C-1 and C-2 correspond to the ‘Comparability’ questions, E-1 through E-3 correspond to the ‘Exposure’ questions, and O-1 through O-3 correspond to the ‘Outcome’ questions reported in Table S2. Letters stand for answers to each question reported in Table S2, and number in parenthesis indicate if the given answer identified a high (1) or low (0) quality rank. Total score is the sum of the score for each answer to the NOS scale. A high score indicates that the study is of high quality.

**Table S4.** Summary risk ratios (RR) of childhood leukemia in the highest exposure category versus the lowest one for traffic density, benzene and nitrogen dioxide (NO<sub>2</sub>) exposure, for all studies and stratified by age at diagnosis, leukemia subtype, exposure timing, and region. Results of leave-one-out sensitivity analysis of range of summary RR (‘min RR’ and ‘max RR’) investigating the influence of each individual study on the overall meta-analysis summary estimates.

**Table S5.** Summary risk ratios (RR) for association of childhood leukemia with particulate matter (PM<sub>2.5</sub>/PM<sub>10</sub>) and 1,3-butadiene comparing the highest versus the lowest exposure categories for all studies, and stratified by age at diagnosis, leukemia subtype, exposure timing, and region. Results of leave-one-out sensitivity analysis of range of summary RR ('min RR' and 'max RR') investigating the influence of each individual study on the overall meta-analysis summary estimates.

**Figure S1.** Risk ratio (RR) of childhood leukemia from indicators of traffic exposure for all children: all studies (A); by leukemia subtype (B); by exposure window, i.e. residence at birth vs. at diagnosis (C); by region/continent (D). The area of each gray square is proportional to the inverse of the variance of the estimated log RR. Black diamonds represent point estimates of RR and horizontal lines represent their 95% confidence intervals (CIs). The open diamonds represent the combined RR for each subgroup and the overall RR for all studies. The solid line represents RR=1. The dash line represents the point estimate of overall RR for all studies.

**Figure S2.** Risk ratio (RR) of childhood leukemia and leukemia subtype from benzene exposure for all children: all studies (A); by leukemia subtype (B); by exposure window, i.e. residence at birth vs. at diagnosis (C); by region/continent (D). The area of each gray square is proportional to the inverse of the variance of the estimated log RR. Black diamonds represent point estimates of RR and horizontal lines represent their 95% confidence intervals (CIs). The open diamonds represent the combined RR for each subgroup and the overall RR for all studies. The solid line represents RR=1. The dash line represents the point estimate of overall RR for all studies.

**Figure S3.** Risk ratio (RR) of childhood leukemia and leukemia subtype from air NO<sub>2</sub> exposure for all children: all studies (A); by leukemia subtype (B); by exposure window, i.e. residence at birth vs. at diagnosis (C); by region/continent (D). The area of each gray square is proportional to the inverse of the variance of the estimated log RR. Black diamonds represent point estimates of RR and horizontal lines represent their 95% confidence intervals (CIs). The open diamonds represent the combined RR for each subgroup and the overall RR for all studies. The solid line represents RR=1. The dash line represents the point estimate of overall RR for all studies.

**Figure S4.** Risk ratio (RR) with 95% confidence interval (CI) of childhood leukemia from particulate matter (PM<sub>2.5</sub>) for all children: all studies (A); by leukemia subtype (B); by exposure window, i.e. residence at birth vs. at diagnosis (C); by region/continent (D). The area of each gray square is proportional to the inverse of the variance of the estimated log RR. Black diamonds represent point estimates of RR and horizontal lines represent their 95% confidence intervals (CIs). The open diamonds represent the combined RR for each subgroup and the overall RR for all studies. The solid line represents RR=1. The dash line represents the point estimate of overall RR for all studies.

**Figure S5.** Risk ratio (RR) with 95% confidence interval (CI) of childhood leukemia from particulate matter (PM<sub>10</sub>) for all children: all studies (A); by leukemia subtype (B); by exposure window, i.e. residence at birth vs. at diagnosis (C); by region/continent (D). The area of each gray square is proportional to the inverse of the variance of the estimated log RR. Black diamonds represent point estimates of RR and horizontal lines represent their 95% confidence intervals (CIs). The open diamonds represent the combined RR for each subgroup and the overall RR for all studies. The solid line represents RR=1. The dash line represents the point estimate of overall RR for all studies.

**Figure S6.** Risk ratio (RR) of childhood leukemia and leukemia subtype from 1,3-butadiene exposure for all children (all pre-school, i.e. <6 years): all studies (A); by leukemia subtype (B); by exposure window, i.e. residence at birth vs. at diagnosis (C); by region/continent (D). The area of each gray square is proportional to the inverse of the variance of the estimated log RR. Black diamonds represent point estimates of RR and horizontal lines represent their 95% confidence intervals (CIs). The open diamonds represent the combined RR for each subgroup and the overall RR for all studies. The solid line represents RR=1. The dash line represents the point estimate of overall RR for all studies.

**Figure S7.** Risk ratio (RR) of childhood leukemia from indicators of traffic exposure restricted to pre-school children: all studies (A); by leukemia subtype (B); by exposure window, i.e. residence at birth vs. at diagnosis (C); by region/continent (D). The area of each gray square is proportional to the inverse of the variance of the estimated log RR. Black diamonds represent point estimates of RR and horizontal lines represent their 95% confidence intervals (CIs). The open diamonds represent the combined RR for each subgroup and the overall RR for all studies. The solid line represents RR=1. The dash line represents the point estimate of overall RR for all studies.

**Figure S8.** Risk ratio (RR) of childhood leukemia and leukemia subtype from benzene exposure restricted to pre-school children: all studies (A); by leukemia subtype (B); by exposure window, i.e. residence at birth vs. at diagnosis (C); by region/continent (D). The area of each gray square is proportional to the inverse of the variance of the estimated log RR. Black diamonds represent point estimates of RR and horizontal lines represent their 95% confidence intervals (CIs). The open diamonds represent the combined RR for each subgroup and the overall RR for all studies. The solid line represents RR=1. The dash line represents the point estimate of overall RR for all studies.

**Figure S9.** Risk ratio (RR) of childhood leukemia and leukemia subtype from air NO<sub>2</sub> exposure restricted to pre-school children: all studies (A); by leukemia subtype (B); by exposure window, i.e. residence at birth vs. at diagnosis (C); by region/continent (D). The area of each gray square is proportional to the inverse of the variance of the estimated log RR. Black diamonds represent point estimates of RR and horizontal lines represent their 95% confidence intervals (CIs). The open diamonds represent the combined RR for each subgroup and the overall RR for all studies. The solid line represents RR=1. The dash line represents the point estimate of overall RR for all studies.

**Figure S10.** Risk ratio (RR) with 95% confidence interval (CI) of childhood leukemia from particulate matter (PM<sub>2.5</sub>) restricted to pre-school children: all studies (A); by leukemia subtype (B); by exposure window, i.e. residence at birth vs. at diagnosis (C); by region/continent (D). The area of each gray square is proportional to the inverse of the variance of the estimated log RR. Black diamonds represent point estimates of RR and horizontal lines represent their 95% confidence intervals (CIs). The open diamonds represent the combined RR for each subgroup and the overall RR for all studies. The solid line represents RR=1. The dash line represents the point estimate of overall RR for all studies.

**Figure S11.** Risk ratio (RR) with 95% confidence interval (CI) of childhood leukemia from particulate matter (PM<sub>10</sub>) restricted to pre-school children: all studies (A); by leukemia subtype (B); by exposure window, i.e. residence at birth vs. at diagnosis (C); by region/continent (D). The area of each gray square is proportional to the inverse of the variance of the estimated log RR. Black diamonds represent point estimates of RR and horizontal lines represent their 95% confidence intervals (CIs). The open diamonds represent the combined RR for each subgroup and the overall RR for all studies. The solid line represents RR=1. The dash line represents the point estimate of overall RR for all studies.

**Figure S12.** Risk ratio (RR) of childhood leukemia from indicators of traffic exposure restricted to older (>6 years) children: all studies (A); by leukemia subtype (B); by exposure window, i.e. residence at birth vs. at diagnosis (C); by region/continent (D). The area of each gray square is proportional to the inverse of the variance of the estimated log RR. Black diamonds represent point estimates of RR and horizontal lines represent their 95% confidence intervals (CIs). The open diamonds represent the combined RR for each subgroup and the overall RR for all studies. The solid line represents RR=1. The dash line represents the point estimate of overall RR for all studies.

**Figure S13.** Risk ratio (RR) of childhood leukemia and leukemia subtype from benzene exposure restricted to older (>6 years) children: all studies (A); by leukemia subtype (B); by exposure window, i.e. residence at birth vs. at diagnosis (C); by region/continent (D). The area of each gray square is proportional to the inverse of the variance of the estimated log RR. Black diamonds represent point estimates of RR and horizontal lines represent their 95% confidence intervals (CIs). The open diamonds represent the combined RR for each subgroup and the overall RR for all studies. The solid line represents RR=1. The dash line represents the point estimate of overall RR for all studies.

**Figure S14.** Risk ratio (RR) of childhood leukemia from NO<sub>2</sub> exposure restricted to older (>6 years) children: all studies (A); by exposure window, i.e. residence at birth vs. at diagnosis (C); by region/continent (C). The area of each gray square is proportional to the inverse of the variance of the estimated log RR. Black diamonds represent point estimates of RR and horizontal lines represent their 95% confidence intervals (CIs). The open diamonds represent the combined RR for each subgroup and the overall RR for all studies. The solid line represents RR=1. The dash line represents the point estimate of overall RR for all studies.

**Figure S15.** Risk ratio (RR) with 95% confidence interval (CI) of childhood leukemia from particulate matter (PM<sub>10</sub>) restricted to pre-school children: all studies (A); by leukemia subtype (B); by exposure window, i.e. residence at birth vs. at diagnosis (C); by region/continent (D). The area of each gray square is proportional to the inverse of the variance of the estimated log RR. Black diamonds represent point estimates of RR and horizontal lines represent their 95% confidence intervals (CIs). The open diamonds represent the combined RR for each subgroup and the overall RR for all studies. The solid line represents RR=1. The dash line represents the point estimate of overall RR for all studies.

**Figure S16.** Sensitivity analysis with summary estimate with 95% confidence interval (CI) of childhood leukemia from indicators of traffic exposure for all children after removal of single study result (leave-one-out analysis): all studies (A); by leukemia subtype (B); by exposure window, i.e. residence at birth vs. at diagnosis (C); by region/continent (D). Each given named study is omitted when computing the overall meta-analysis summary estimate. Hollow circles represent point estimates of RR and horizontal dotted lines represent their 95% confidence intervals (CIs). The solid lines represent the point estimate of overall RR for all studies with its 95% CI.

**Figure S17.** Sensitivity analysis with summary estimate with 95% confidence interval (CI) of childhood leukemia from benzene exposure for all children after removal of single study result (leave-one-out analysis): all studies (A); by leukemia subtype (B); by exposure window, i.e. residence at birth vs. at diagnosis (C); by region/continent (D). Each given named study is omitted when computing the overall meta-analysis summary estimate. Hollow circles represent point estimates of RR and horizontal dotted lines represent their 95% confidence intervals (CIs). The solid lines represent the point estimate of overall RR for all studies with its 95% CI.

**Figure S18.** Sensitivity analysis with summary estimate with 95% confidence interval (CI) of childhood leukemia from nitrogen dioxide exposure for all children after removal of single study result (leave-one-out analysis): all studies (A); by leukemia subtype (B); by exposure window, i.e. residence at birth vs. at diagnosis (C); by region/continent (D). Each given named study is omitted when computing the overall meta-analysis summary estimate. Hollow circles represent point estimates of RR and horizontal dotted lines represent their 95% confidence intervals (CIs). The solid lines represent the point estimate of overall RR for all studies with its 95% CI.

**Figure S19.** Sensitivity analysis entering a  $\pm 15\%$  value instead of  $\pm 20$  in the dose-response meta-analysis of childhood leukemia risk from traffic indicators using vehicles per day count (A), road density in km/km<sup>2</sup> (B), and distance from a major road in meters (C). Overall spline curve (black solid line) with 95% confidence limits (black dashed lines). RR: risk ratio.

**Figure S20.** Sensitivity analysis entering a  $\pm 15\%$  value instead of  $\pm 20$  in the dose-response meta-analysis of childhood leukemia risk from benzene exposure of all leukemia (A), acute lymphoblastic leukemia only (B), and acute myeloid leukemia only (C). Overall spline curve (black solid line) with 95% confidence limits (black dashed lines). RR: risk ratio.

**Figure S21.** Sensitivity analysis entering a  $\pm 15\%$  value instead of  $\pm 20$  in the dose-response meta-analysis of childhood leukemia risk from nitrogen dioxide exposure of all leukemia (A), acute lymphoblastic leukemia only (B), and acute myeloid leukemia only (C). Overall spline curve (black solid line) with 95% confidence limits (black dashed lines). RR: risk ratio.

**Figure S22.** Funnel plots for publication bias for traffic density, benzene, nitrogen dioxide (NO<sub>2</sub>), particulate matter (PM<sub>2.5</sub>/PM<sub>10</sub>), and 1,3-butadiene indicators. Black diamonds represent studies included in each analysis, the x-axis indicates the study effect/results through its risk ratio (RR), and the y-axis indicates study precision through its standard error. The outer dashed lines indicate the triangular region within which 95% of studies are expected to lie in the absence of both biases and heterogeneity. The solid vertical line corresponds to overall summary RR from meta-analysis of included studies.

**Figure S23.** Dose-response meta-analysis of childhood leukemia risk from traffic indicators using vehicles per day count (A), road density in km/km<sup>2</sup> (B), and distance from a major road in meters (C). Overall spline curve (black solid line) with 95% confidence limits (black dashed lines) and the study-specific trends showing the influence of variation across studies (gray solid lines). RR: risk ratio.

**Figure S24.** Dose-response meta-analysis of childhood leukemia risk from benzene exposure of all leukemia (A), acute lymphoblastic leukemia only (B), and acute myeloid leukemia only (C). Overall spline curve (black solid line) with 95% confidence limits (black dashed lines) and the study-specific trends showing the influence of variation across studies (gray solid lines). RR: risk ratio.

**Figure S25.** Dose-response meta-analysis of childhood leukemia risk from NO<sub>2</sub> exposure of all leukemia (A), acute lymphoblastic leukemia only (B), and acute myeloid leukemia only (C). Overall spline curve (black solid line) with 95% confidence limits (black dashed lines) and the study-specific trends showing the influence of variation across studies (gray solid lines). RR: risk ratio.

**Additional File- Excel Document**

**References**
